# Supplementary material for: Palladium-catalyzed C–Si bond formation via denitrative cross-coupling of nitroarenes with hexamethyldisilane
Source: Royal Society of Chemistry journal article supplement (doi:10.1039/d2qo01764d), 2022-12-09

# Supporting Information

## Palladium-Catalyzed C–Si bond Formation via Denitrative Cross-Coupling of Nitroarenes with Hexamethyldisilane

Jiaxin Yao,<sup>†</sup> Lin Yu,<sup>\*,†</sup> Wengui Duan,<sup>\*,†</sup> and Chao-Jun Li<sup>‡</sup>

<sup>†</sup> School of Chemistry and Chemical Engineering, Guangxi University, Guangxi Key Laboratory of Electrochemical Energy Materials, No. 100, East Daxue Road, Nanning, Guangxi 530004, P. R. China.

<sup>‡</sup> Department of Chemistry and FRQNT Center for Green Chemistry and Catalysis, McGill University, 801 Sherbrooke Street West, Montreal, Quebec H3A 0B8, Canada.

E-mail: \*linyu@gxu.edu.cn; \*wgduan@gxu.edu.cn

### Table of Contents

|                                                                                |     |
|--------------------------------------------------------------------------------|-----|
| 1. General Information .....                                                   | S2  |
| 2. Optimization of the Reaction Conditions .....                               | S2  |
| 3. General Procedure for Product 3 .....                                       | S3  |
| 4. Characterization Data of Products .....                                     | S3  |
| 5. Derivatizations of Products and Characterization Data of Derivatives .....  | S9  |
| 6. The Selective Transformations of the C–Br and C–NO <sub>2</sub> Bonds ..... | S10 |
| 7. 1 mmol Scale Experiments .....                                              | S11 |
| 8. References .....                                                            | S12 |
| 9. NMR Spectra of Products and Derivatives .....                               | S14 |

## 1. General Information

<sup>1</sup>H NMR spectra were recorded on Bruker 500 MHz spectrometer and the chemical shifts were reported in parts per million ( $\delta$ ) relative to internal solvent signal (7.261 ppm in CDCl<sub>3</sub>). The peak patterns are indicated as follows: s, singlet; d, doublet; dd, doublet of doublet; t, triplet; q, quartet; m, multiplet. The coupling constants, J, are reported in Hertz (Hz). <sup>13</sup>C NMR spectra were obtained at Bruker 126 MHz and referenced to the internal solvent signals (central peak is 77.000 ppm in CDCl<sub>3</sub>). CDCl<sub>3</sub> was used as the NMR solvent. APEX II (Bruker Inc.) was used for HR-MS and APCI-MS.

Unless otherwise noted, all reagents were purchased from commercial suppliers (Energy-Chemical, Bidepharm, Heowns, or TCI) and used without further purification. Flash column chromatography was performed over silica gel 200-300. The reagents were weighed and handled in a glove box. All reactions were heated by metal sand bath (WATTCAS, LAB-500, <https://www.wattcas.com>).

## 2. Optimization of the Reaction Conditions

Table S1. Optimization of the reaction conditions <sup>a,b</sup>

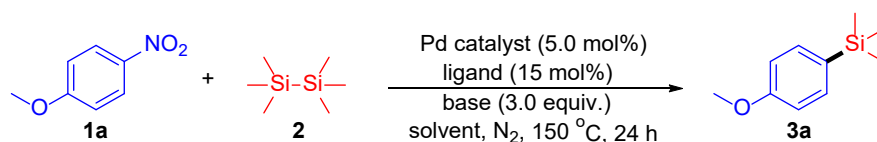

| entry | catalyst                           | ligand                   | base                                              | solvent           | 3a/yield/% |
|-------|------------------------------------|--------------------------|---------------------------------------------------|-------------------|------------|
| 1     | Pd(acac) <sub>2</sub>              | BrettPhos                | KF                                                | PhCF <sub>3</sub> | 0          |
| 2     | Pd(acac) <sub>2</sub>              | BrettPhos                | CsF                                               | PhCF <sub>3</sub> | 0          |
| 3     | Pd(acac) <sub>2</sub>              | BrettPhos                | K <sub>3</sub> PO <sub>4</sub>                    | PhCF <sub>3</sub> | 53         |
| 4     | Pd(acac) <sub>2</sub>              | BrettPhos                | K <sub>3</sub> PO <sub>4</sub> ·3H <sub>2</sub> O | PhCF <sub>3</sub> | 55         |
| 5     | Pd(acac) <sub>2</sub>              | BrettPhos                | Li <sub>2</sub> CO <sub>3</sub>                   | PhCF <sub>3</sub> | 0          |
| 6     | Pd(acac) <sub>2</sub>              | BrettPhos                | K <sub>2</sub> CO <sub>3</sub>                    | PhCF <sub>3</sub> | 32         |
| 7     | Pd(acac) <sub>2</sub>              | BrettPhos                | Rb <sub>2</sub> CO <sub>3</sub>                   | PhCF <sub>3</sub> | 45         |
| 8     | Pd(acac) <sub>2</sub>              | BrettPhos                | Cs <sub>2</sub> CO <sub>3</sub>                   | PhCF <sub>3</sub> | 69         |
| 9     | Pd(acac) <sub>2</sub>              | BrettPhos                | KOH                                               | PhCF <sub>3</sub> | 0          |
| 10    | Pd(acac) <sub>2</sub>              | BrettPhos                | <sup>t</sup> BuOLi                                | PhCF <sub>3</sub> | trace      |
| 11    | Pd(acac) <sub>2</sub>              | BrettPhos                | AcOK                                              | PhCF <sub>3</sub> | 0          |
| 12    | Pd(acac) <sub>2</sub>              | BrettPhos                | Cs <sub>2</sub> CO <sub>3</sub>                   | PhF               | 48         |
| 13    | Pd(acac) <sub>2</sub>              | BrettPhos                | Cs <sub>2</sub> CO <sub>3</sub>                   | <i>n</i> -heptane | 20         |
| 14    | Pd(acac) <sub>2</sub>              | BrettPhos                | Cs <sub>2</sub> CO <sub>3</sub>                   | toluene           | 40         |
| 15    | Pd(acac) <sub>2</sub>              | BrettPhos                | Cs <sub>2</sub> CO <sub>3</sub>                   | <i>p</i> -xylene  | 22         |
| 16    | Pd(acac) <sub>2</sub>              | BrettPhos                | Cs <sub>2</sub> CO <sub>3</sub>                   | <i>m</i> -xylene  | 30         |
| 17    | Pd(acac) <sub>2</sub>              | BrettPhos                | Cs <sub>2</sub> CO <sub>3</sub>                   | 1,4-dioxane       | 0          |
| 18    | Pd(acac) <sub>2</sub>              | BrettPhos                | Cs <sub>2</sub> CO <sub>3</sub>                   | DMF               | 0          |
| 19    | Pd(acac) <sub>2</sub>              | BrettPhos                | Cs <sub>2</sub> CO <sub>3</sub>                   | DMSO              | 0          |
| 20    | Pd(TFA) <sub>2</sub>               | BrettPhos                | Cs <sub>2</sub> CO <sub>3</sub>                   | PhCF <sub>3</sub> | 30         |
| 21    | Pd(OAc) <sub>2</sub>               | BrettPhos                | Cs <sub>2</sub> CO <sub>3</sub>                   | PhCF <sub>3</sub> | 25         |
| 22    | Pd <sub>2</sub> (dba) <sub>3</sub> | BrettPhos                | Cs <sub>2</sub> CO <sub>3</sub>                   | PhCF <sub>3</sub> | 0          |
| 23    | Pd(dba) <sub>2</sub>               | BrettPhos                | Cs <sub>2</sub> CO <sub>3</sub>                   | PhCF <sub>3</sub> | 0          |
| 24    | [Pd(allyl)Cl] <sub>2</sub>         | BrettPhos                | Cs <sub>2</sub> CO <sub>3</sub>                   | PhCF <sub>3</sub> | trace      |
| 25    | Pd(acac) <sub>2</sub>              | <sup>t</sup> BuBrettPhos | Cs <sub>2</sub> CO <sub>3</sub>                   | PhCF <sub>3</sub> | 8          |
| 26    | Pd(acac) <sub>2</sub>              | XantPhos                 | Cs <sub>2</sub> CO <sub>3</sub>                   | PhCF <sub>3</sub> | 0          |
| 27    | Pd(acac) <sub>2</sub>              | DPPF                     | Cs <sub>2</sub> CO <sub>3</sub>                   | PhCF <sub>3</sub> | 0          |

|                       |                       |                      |                                 |                   |                     |
|-----------------------|-----------------------|----------------------|---------------------------------|-------------------|---------------------|
| 28                    | Pd(acac) <sub>2</sub> | <sup>t</sup> BuXPhos | Cs <sub>2</sub> CO <sub>3</sub> | PhCF <sub>3</sub> | 15                  |
| 29 <sup>c</sup>       | Pd(acac) <sub>2</sub> | BrettPhos            | Cs <sub>2</sub> CO <sub>3</sub> | PhCF <sub>3</sub> | 72                  |
| 30 <sup>d</sup>       | Pd(acac) <sub>2</sub> | BrettPhos            | Cs <sub>2</sub> CO <sub>3</sub> | PhCF <sub>3</sub> | 77                  |
| 31 <sup>e</sup>       | Pd(acac) <sub>2</sub> | BrettPhos            | Cs <sub>2</sub> CO <sub>3</sub> | PhCF <sub>3</sub> | 69                  |
| 32 <sup>d, f</sup>    | Pd(acac) <sub>2</sub> | BrettPhos            | Cs <sub>2</sub> CO <sub>3</sub> | PhCF <sub>3</sub> | 66                  |
| 33 <sup>d, g</sup>    | Pd(acac) <sub>2</sub> | BrettPhos            | Cs <sub>2</sub> CO <sub>3</sub> | PhCF <sub>3</sub> | 71                  |
| 34 <sup>d, h</sup>    | Pd(acac) <sub>2</sub> | BrettPhos            | Cs <sub>2</sub> CO <sub>3</sub> | PhCF <sub>3</sub> | 83(78) <sup>i</sup> |
| 35 <sup>d, j</sup>    | Pd(acac) <sub>2</sub> | BrettPhos            | Cs <sub>2</sub> CO <sub>3</sub> | PhCF <sub>3</sub> | 67                  |
| 36 <sup>d, h, k</sup> | Pd(acac) <sub>2</sub> | BrettPhos            | Cs <sub>2</sub> CO <sub>3</sub> | PhCF <sub>3</sub> | 82                  |
| 37 <sup>d, h, l</sup> | Pd(acac) <sub>2</sub> | BrettPhos            | Cs <sub>2</sub> CO <sub>3</sub> | PhCF <sub>3</sub> | 75                  |
| 38 <sup>d, h, m</sup> | Pd(acac) <sub>2</sub> | BrettPhos            | Cs <sub>2</sub> CO <sub>3</sub> | PhCF <sub>3</sub> | 27                  |

<sup>a</sup> Reaction conditions: 4-nitroanisole **1a** (0.30 mmol), hexamethyldisilane **2** (0.20 mmol), catalyst (5.0 mol%), ligand (15 mol%) and base (3.0 equiv.) in PhCF<sub>3</sub> (1.5 mL) at 150 °C for 24 hours under N<sub>2</sub>; <sup>b</sup> The yields of **3a** were determined by <sup>1</sup>H NMR using 1,3,5-trimethoxybenzene as an internal standard; <sup>c</sup> PhCF<sub>3</sub> (0.5 mL), <sup>d</sup> PhCF<sub>3</sub> (1.0 mL), <sup>e</sup> PhCF<sub>3</sub> (2.0 mL); <sup>f</sup> Cs<sub>2</sub>CO<sub>3</sub> (1.0 equiv.), <sup>g</sup> Cs<sub>2</sub>CO<sub>3</sub> (2.0 equiv.), <sup>h</sup> Cs<sub>2</sub>CO<sub>3</sub> (4.0 equiv.), <sup>j</sup> Cs<sub>2</sub>CO<sub>3</sub> (5.0 equiv.); <sup>i</sup> Isolated yield; <sup>k</sup> Additive (H<sub>2</sub>O, 2.0 equiv.), <sup>l</sup> Additive (CaSO<sub>4</sub>, 2.0 equiv.); <sup>m</sup> In air.

### 3. General Procedure for Product 3

In a glovebox, a flame-dried reaction tube (35 mL) equipped with a magnetic stir bar was charged with Pd(acac)<sub>2</sub> (3.1 mg, 5 mol%), BrettPhos (16.1 mg, 15 mol%), 1-methoxy-4-nitrobenzene **1a** (0.3 mmol), hexamethyldisilane **2** (0.2 mmol) and Cs<sub>2</sub>CO<sub>3</sub> (0.8 mmol) before being sealed with a rubber septum. The reaction mixture was stirred at 150 °C for 24 hours. After the mixture was cooled to room temperature, the resulting solution was directly filtered. The solvent was evaporated in vacuo to give the crude products. The residue was purified by flash column chromatography on silica gel (petroleum ether/ethyl acetate) to give the desired product **3**.

### 4. Characterization Data of Products

#### (4-Methoxyphenyl)trimethylsilane (**3a**)

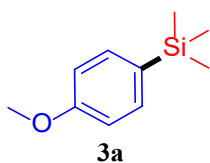

Following the general procedure, the title compound was isolated by flash column chromatography on silica gel (petroleum ether/EtOAc=50:1) as a colourless oil in (78 %, 28.1 mg) yield. The spectral data were in accordance with those reported in the literature<sup>1</sup>. <sup>1</sup>H NMR (500 MHz, CDCl<sub>3</sub>) δ 7.49 (d, *J* = 8.6 Hz, 2H), 6.95 (d, *J* = 8.6 Hz, 2H), 3.84 (s, 3H), 0.29 (s, 9H); <sup>13</sup>C NMR (126 MHz, CDCl<sub>3</sub>) δ 160.2, 134.7, 131.2, 113.5, 54.9, -1.0.

#### (3,4-Dimethoxyphenyl)trimethylsilane (**3b**)

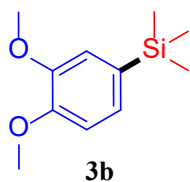

Following the general procedure, the title compound was isolated by flash column chromatography on silica gel (petroleum ether/EtOAc=50:1) as a colourless oil in (86 %, 36.2 mg) yield; The spectral data were in accordance with those reported in the literature<sup>2</sup>. **<sup>1</sup>H NMR** (500 MHz, CDCl<sub>3</sub>) δ 7.09 (dd, *J* = 7.8, 1.2 Hz, 1H), 7.01 (s, 1H), 6.90 (d, *J* = 7.8 Hz, 1H), 3.91 (s, 3H), 3.89 (s, 3H), 0.27 (s, 9H); **<sup>13</sup>C NMR** (126 MHz, CDCl<sub>3</sub>) δ 149.7, 148.5, 131.8, 126.4, 115.7, 110.9, 55.817, 55.7, -1.0.

**(4-Methoxy-3-methylphenyl)trimethylsilane (3c)**

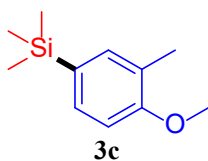

Following the general procedure, the title compound was isolated by flash column chromatography on silica gel (petroleum ether) as a colourless oil in (56 %, 27.1 mg) yield. **<sup>1</sup>H NMR** (500 MHz, CDCl<sub>3</sub>) δ 7.38 (dd, *J* = 8.0, 1.4 Hz, 1H), 7.33 (s, 1H), 6.88 (d, *J* = 8.0 Hz, 1H), 3.87 (s, 3H), 2.29 (s, 3H), 0.30 (s, 9H); **<sup>13</sup>C NMR** (126 MHz, CDCl<sub>3</sub>) δ 158.5, 135.7, 132.3, 130.8, 126.0, 109.45, 55.1, 16.2, -0.9. **HRMS** (APCI) calcd for C<sub>11</sub>H<sub>18</sub>OSi [M + H<sup>+</sup>], 195.1200; found: 195.1198.

**(4-Methoxy-3,5-dimethylphenyl)trimethylsilane (3d)**

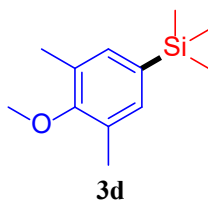

Following the general procedure, the title compound was isolated by flash column chromatography on silica gel (petroleum ether/EtOAc=50:1) as a colourless oil in (74 %, 30.8 mg) yield; **<sup>1</sup>H NMR** (500 MHz, CDCl<sub>3</sub>) δ 7.21 (s, 2H), 3.78 (s, 3H), 2.35 (s, 6H), 0.30 (s, 9H); **<sup>13</sup>C NMR** (126 MHz, CDCl<sub>3</sub>) δ 157.7, 135.3, 134.1, 130.1, 59.5, 16.1, -1.0. **HRMS** (APCI) calcd for C<sub>12</sub>H<sub>20</sub>OSi [M + H<sup>+</sup>], 209.1356; found: 209.1355.

**(2,3-Dihydrobenzofuran-5-yl)trimethylsilane (3e)**

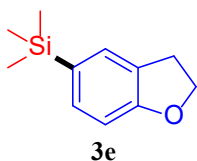

Following the general procedure, the title compound was isolated by flash column chromatography on silica gel (petroleum ether) as a colourless oil in (75 %, 28.8 mg) yield. **<sup>1</sup>H NMR** (500 MHz, CDCl<sub>3</sub>) δ

7.39 (d,  $J = 0.6$  Hz, 1H), 7.33 – 7.29 (m, 1H), 6.84 (d,  $J = 7.8$  Hz, 1H), 4.58 (t,  $J = 8.7$  Hz, 2H), 3.24 (t,  $J = 8.7$  Hz, 2H), 0.28 (s, 9H);  $^{13}\text{C}$  NMR (126 MHz,  $\text{CDCl}_3$ )  $\delta$  160.9, 133.4, 131.1, 129.8, 126.6, 109.1, 71.0, 29.5, -0.8. HRMS (APCI) calcd for  $\text{C}_{11}\text{H}_{16}\text{OSi}$  [ $\text{M} + \text{H}^+$ ], 193.1043; found: 193.1042.

#### Trimethyl(4-phenoxyphenyl)silane (3f)

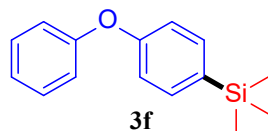

Following the general procedure, the title compound was isolated by flash column chromatography on silica gel (petroleum ether) as a colourless oil in (56 %, 27.1 mg) yield. The spectral data were in accordance with those reported in the literature<sup>3</sup>.  $^1\text{H}$  NMR (500 MHz,  $\text{CDCl}_3$ )  $\delta$  7.55 – 7.50 (m, 2H), 7.38 (dd,  $J = 8.6, 7.4$  Hz, 2H), 7.15 (s, 1H), 7.09 – 7.03 (m, 4H), 0.32 (s, 9H);  $^{13}\text{C}$  NMR (126 MHz,  $\text{CDCl}_3$ )  $\delta$  158.1, 156.9, 134.9, 134.4, 129.7, 123.4, 119.2, 118.0, -1.0.

#### Trimethyl(p-tolyl)silane (3g)

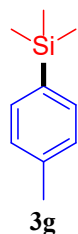

Following the general procedure, the title compound was isolated by flash column chromatography on silica gel (petroleum ether) as a colourless oil in (55 %, 18.1 mg) yield. The spectral data were in accordance with those reported in the literature<sup>4</sup>.  $^1\text{H}$  NMR (500 MHz,  $\text{CDCl}_3$ )  $\delta$  7.44 (d,  $J = 7.7$  Hz, 2H), 7.19 (d,  $J = 7.5$  Hz, 2H), 2.36 (s, 3H), 0.26 (s, 9H).  $^{13}\text{C}$  NMR (126 MHz,  $\text{CDCl}_3$ )  $\delta$  138.6, 136.8, 133.3, 128.6, 21.4, -1.1.

#### Trimethyl(m-tolyl)silane (3h)

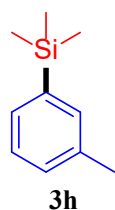

Following the general procedure, the title compound was isolated by flash column chromatography on silica gel (petroleum ether) as a colourless oil in (58 %, 19.1 mg) yield. The spectral data were in accordance with those reported in the literature<sup>4</sup>.  $^1\text{H}$  NMR (500 MHz,  $\text{CDCl}_3$ )  $\delta$  7.33 (d,  $J = 6.3$  Hz, 2H), 7.26 (t,  $J = 7.6$  Hz, 1H), 7.19 – 7.16 (m, 1H), 2.37 (s, 3H), 0.27 (s, 9H);  $^{13}\text{C}$  NMR (126 MHz,  $\text{CDCl}_3$ )  $\delta$  140.5, 137.2, 134.1, 130.5, 129.7, 127.8, 21.7, -1.0.

#### (3,5-Dimethylphenyl)trimethylsilane (3i)

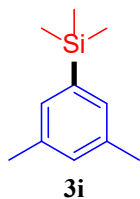

Following the general procedure, the title compound was isolated by flash column chromatography on silica gel (petroleum ether) as a colourless oil in (56 %, 20.0 mg) yield. The spectral data were in accordance with those reported in the literature<sup>5</sup>. **<sup>1</sup>H NMR** (500 MHz, CDCl<sub>3</sub>) δ 7.16 (s, 2H), 7.03 (s, 1H), 2.35 (s, 6H), 0.28 (s, 9H); **<sup>13</sup>C NMR** (126 MHz, CDCl<sub>3</sub>) δ 140.2, 137.0, 131.0, 130.6, 21.4, -1.1.

**(3,4-Dimethylphenyl)trimethylsilane (3j)**

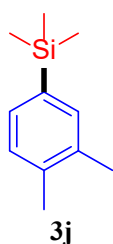

Following the general procedure, the title compound was isolated by flash column chromatography on silica gel (petroleum ether) as a colourless oil in (56 %, 20.0 mg) yield. The spectral data were in accordance with those reported in the literature<sup>6</sup>. **<sup>1</sup>H NMR** (500 MHz, CDCl<sub>3</sub>) δ 7.31 (d, *J* = 10.4 Hz, 2H), 7.17 (d, *J* = 7.3 Hz, 1H), 2.32 (s, 3H), 2.30 (s, 3H), 0.29 (s, 9H); **<sup>13</sup>C NMR** (126 MHz, CDCl<sub>3</sub>) δ 137.4, 137.3, 135.8, 134.6, 131.0, 129.2, 19.7, -1.0.

**(3-(*tert*-Butyl)phenyl)trimethylsilane (3k)**

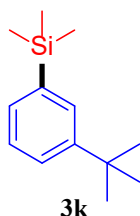

Following the general procedure, the title compound was isolated by flash column chromatography on silica gel (petroleum ether) as a colourless oil in (44 %, 18.2 mg) yield. The spectral data were in accordance with those reported in the literature<sup>7</sup>. **<sup>1</sup>H NMR** (500 MHz, CDCl<sub>3</sub>) δ 7.60 (d, *J* = 0.9 Hz, 1H), 7.48 – 7.31 (m, 3H), 1.38 (s, 9H), 0.32 (s, 9H); **<sup>13</sup>C NMR** (126 MHz, CDCl<sub>3</sub>) δ 150.0, 139.9, 130.5, 129.9, 127.4, 125.89, 34.7, 31.4, -1.0.

***N,N*-Dimethyl-4-(trimethylsilyl)aniline (3l)**

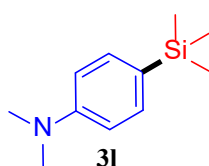

Following the general procedure, the title compound was isolated by flash column chromatography on silica gel (petroleum ether/EtOAc=40:1) as a colourless oil in (73 %, 28.2 mg) yield. The spectral data were in accordance with those reported in the literature<sup>1</sup>. **<sup>1</sup>H NMR** (500 MHz, CDCl<sub>3</sub>) δ 7.46 (d, *J* = 8.6 Hz, 2H), 6.80 (d, *J* = 8.6 Hz, 2H), 3.01 (s, 6H), 0.29 (s, 9H); **<sup>13</sup>C NMR** (126 MHz, CDCl<sub>3</sub>) δ 151.1, 134.5, 125.8, 112.1, 40.4, -0.7.

#### 4-(4-(Trimethylsilyl)phenyl)morpholine (3m)

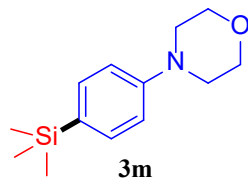

Following the general procedure, the title compound was isolated by flash column chromatography on silica gel (petroleum ether/EtOAc=20:1) as a white solid in (84 %, 39.5 mg) yield; The spectral data were in accordance with those reported in the literature<sup>8</sup>. **<sup>1</sup>H NMR** (500 MHz, CDCl<sub>3</sub>) δ 7.54 (d, *J* = 8.6 Hz, 2H), 7.00 (d, *J* = 8.6 Hz, 2H), 3.95 – 3.91 (m, 4H), 3.28 – 3.24 (m, 4H), 0.35 (s, 9H); **<sup>13</sup>C NMR** (126 MHz, CDCl<sub>3</sub>) δ 151.5, 134.3, 129.8, 114.7, 66.7, 48.7, -1.0.

#### 9-(4-(Trimethylsilyl)phenyl)-9H-carbazole (3n)

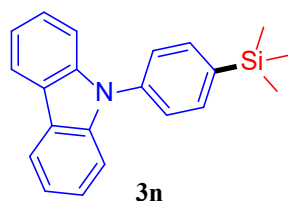

Following the general procedure, the title compound was isolated by flash column chromatography on silica gel (petroleum ether) as a white solid in (32 %, 20.2 mg) yield; The spectral data were in accordance with those reported in the literature<sup>9</sup>. **<sup>1</sup>H NMR** (500 MHz, CDCl<sub>3</sub>) δ 8.17 (d, *J* = 7.7 Hz, 2H), 7.79 – 7.75 (m, 2H), 7.60 – 7.57 (m, 2H), 7.48 (d, *J* = 8.2 Hz, 2H), 7.43 (dt, *J* = 8.2, 4.1 Hz, 2H), 7.33 – 7.29 (m, 2H), 0.40 (s, 9H); **<sup>13</sup>C NMR** (126 MHz, CDCl<sub>3</sub>) δ 140.8, 139.8, 138.1, 134.8, 126.2, 125.9, 123.4, 120.3, 119.9, 109.9, -1.1.

#### 1-Methyl-5-(trimethylsilyl)-1H-indole (3o)

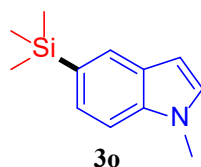

Following the general procedure, the title compound was isolated by flash column chromatography on silica gel (petroleum ether) as a colourless oil in (95 %, 38.6 mg) yield; The spectral data were in accordance with those reported in the literature<sup>10</sup>; **<sup>1</sup>H NMR** (500 MHz, CDCl<sub>3</sub>) δ 7.90 (s, 1H), 7.45 (d, *J* = 8.1 Hz, 1H), 7.40 (d, *J* = 8.1 Hz, 1H), 7.08 (d, *J* = 3.1 Hz, 1H), 6.56 (d, *J* = 3.1 Hz, 1H), 3.82 (s, 3H), 0.39 (s, 9H); **<sup>13</sup>C NMR** (126 MHz, CDCl<sub>3</sub>) δ 137.3, 129.3, 128.8, 128.6, 126.5, 126.3, 109.0, 101.1, 32.7, -0.5.

### Benzo[b]thiophen-5-yltrimethylsilane (3p)

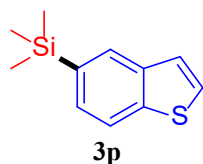

Following the general procedure, the title compound was isolated by flash column chromatography on silica gel (petroleum ether) as a colourless oil in (33 %, 13.6 mg) yield; The spectral data were in accordance with those reported in the literature<sup>11</sup> **<sup>1</sup>H NMR** (500 MHz, CDCl<sub>3</sub>) δ 8.02 (s, 1H), 7.91 (d, *J* = 8.0 Hz, 1H), 7.50 (d, *J* = 8.5 Hz, 1H), 7.44 (d, *J* = 5.4 Hz, 1H), 7.36 (d, *J* = 5.4 Hz, 1H), 0.35 (s, 9H); **<sup>13</sup>C NMR** (126 MHz, CDCl<sub>3</sub>) δ 140.6, 139.4, 135.7, 128.9, 128.9, 126.1, 124.0, 122.0, -0.8.

### [1,1'-Biphenyl]-4-yltrimethylsilane (3q)

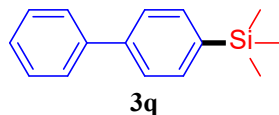

Following the general procedure, the title compound was isolated by flash column chromatography on silica gel (petroleum ether) as a white solid in (58 %, 26.3 mg) yield; The spectral data were in accordance with those reported in the literature<sup>12</sup>. **<sup>1</sup>H NMR** (500 MHz, CDCl<sub>3</sub>) δ 7.65 – 7.60 (m, 6H), 7.46 (t, *J* = 7.7 Hz, 2H), 7.39 – 7.35 (m, 1H), 0.33 (s, 9H). **<sup>13</sup>C NMR** (126 MHz, CDCl<sub>3</sub>) δ 141.8, 141.3, 139.4, 134.0, 128.9, 127.5, 127.3, 126.6, -0.9.

### [1,1'-Biphenyl]-3-yltrimethylsilane (3r)

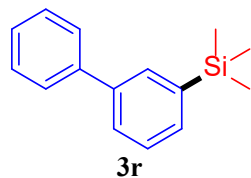

Following the general procedure, the title compound was isolated by flash column chromatography on silica gel (petroleum ether) as a colourless oil in (58 %, 26.3 mg) yield. The spectral data were in accordance with those reported in the literature<sup>13</sup>. **<sup>1</sup>H NMR** (500 MHz, CDCl<sub>3</sub>) δ 7.78 (s, 1H), 7.66 – 7.61 (m, 3H), 7.56 (dd, *J* = 4.8, 3.6 Hz, 1H), 7.49 (dt, *J* = 7.2, 5.3 Hz, 3H), 7.40 (d, *J* = 7.4 Hz, 1H), 0.37 (s, 9H); **<sup>13</sup>C NMR** (126 MHz, CDCl<sub>3</sub>) δ 141.6, 141.0, 140.5, 132.2, 132.1, 128.7, 128.1, 127.7, 127.3, 127.2, -1.1.

### (9,9-Dimethyl-9H-fluoren-2-yl)trimethylsilane (3s)

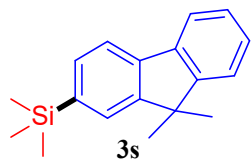



Following the general procedure, the title compound was isolated by flash column chromatography on silica gel (petroleum ether) as a colourless oil in (56 %, 29.8 mg) yield; The spectral data were in accordance with those reported in the literature<sup>13</sup>. <sup>1</sup>H NMR (500 MHz, CDCl<sub>3</sub>) δ 7.78 – 7.74 (m, 2H), 7.62 (s, 1H), 7.55 (dd, *J* = 7.4, 0.9 Hz, 1H), 7.49 – 7.46 (m, 1H), 7.38 – 7.34 (m, 2H), 1.54 (s, 6H), 0.37 (s, 9H); <sup>13</sup>C NMR (126 MHz, CDCl<sub>3</sub>) δ 153.8, 152.7, 139.9, 139.4, 139.1, 132.1, 127.4, 127.2, 126.9, 122.6, 120.1, 119.3, 46.8, 27.2, -0.8.

#### Trimethyl(naphthalen-2-yl)silane (3t)

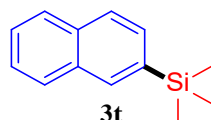

Following the general procedure, the title compound was isolated by flash column chromatography on silica gel (petroleum ether) as a colourless oil in (40 %, 16.0 mg) yield; The spectral data were in accordance with those reported in the literature<sup>1</sup>; <sup>1</sup>H NMR (500 MHz, CDCl<sub>3</sub>) δ 8.03 (s, 1H), 7.85 (ddd, *J* = 11.7, 5.9, 3.2 Hz, 3H), 7.62 (dd, *J* = 8.1, 1.1 Hz, 1H), 7.51 – 7.47 (m, 2H), 0.37 (s, 9H); <sup>13</sup>C NMR (126 MHz, CDCl<sub>3</sub>) δ 137.9, 133.7, 133.6, 132.9, 129.8, 128.0, 127.7, 126.9, 126.2, 125.8, -1.1.

## 5. Derivatizations of Products and Characterization Data of Derivatives

#### (4-Methoxy-3,5-dimethylphenyl)trimethylsilane (4)

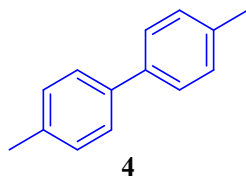

In a glovebox, a flame-dried reaction tube (35 mL) equipped with a magnetic stir bar was charged with **3g** (57.0 μL, 0.3 mmol), Pd(MeCN)<sub>4</sub>(BF<sub>4</sub>)<sub>2</sub> (3.3 mg, 2.5 mol%), *o*-chloranil (55.3 mg, 0.225 mmol), CHCl<sub>3</sub> (1.5 mL) before being sealed with a rubber septum. The reaction mixture was stirred at 60 °C for 10 hours. After the mixture was cooled to room temperature, the resulting solution was directly filtered. The solvent was evaporated in vacuo to give the crude products. The residue was purified by flash column chromatography on silica gel (petroleum ether) to give the desired product **4** (23.4 mg, 86%); The spectral data were in accordance with those reported in the literature<sup>14</sup>; <sup>1</sup>H NMR (500 MHz, CDCl<sub>3</sub>) δ 7.40 (d, *J* = 8.1 Hz, 4H), 7.15 (d, *J* = 7.9 Hz, 4H), 2.31 (s, 6H); <sup>13</sup>C NMR (126 MHz, CDCl<sub>3</sub>) δ 138.3, 136.7, 129.4, 126.8, 21.1.

#### 1,2-Diiodo-4,5-dimethoxybenzene (5)

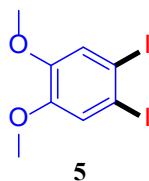

In air, a flame-dried reaction tube (35 mL) equipped with a magnetic stir bar was charged with **3b** (42.1 mg, 0.2 mmol), I<sub>2</sub> (50.8mg,0.2mmol),1-chloromethyl-4-fluoro-1,4-diazabicyclo [2.2.2] octane di(tetrafluoroborate) salt (142.0 mg, 0.4 mmol), CH<sub>3</sub>CN (1.5 mL) before being sealed with a rubber septum. The reaction mixture was stirred at room temperature for 1 hour. The solvent was evaporated in vacuo to give the crude products. The residue was purified by flash column chromatography on silica gel (petroleum ether) to give the desired product **5** (50.0 mg, 65%); The spectral data were in accordance with those reported in the literature<sup>15</sup>; <sup>1</sup>H NMR (500 MHz, CDCl<sub>3</sub>) δ 7.23 (s, 2H), 3.83 (s, 6H); <sup>13</sup>C NMR (126 MHz, CDCl<sub>3</sub>) δ 149.6, 121.6, 96.0, 56.1.

#### 4-Fluoro-1,1'-biphenyl (**6**)

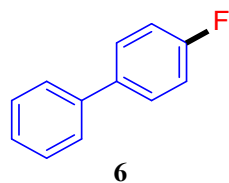

In a glovebox, a flame-dried reaction tube (35 mL) equipped with a magnetic stir bar was charged with **3q** (45.3 mg, 0.2 mmol), Pb(OAc)<sub>4</sub> (106.4 mg, 0.24 mmol), BF<sub>3</sub>·Et<sub>2</sub>O (5.0 mL) before being sealed with a rubber septum. The reaction mixture was stirred overnight at room temperature, the resulting solution was directly filtered. The solvent was evaporated in vacuo to give the crude products. The residue was purified by flash column chromatography on silica gel (petroleum ether) to give the desired product **6** (31.0 mg, 90%); The spectral data were in accordance with those reported in the literature<sup>16</sup>; <sup>1</sup>H NMR (500 MHz, CDCl<sub>3</sub>) δ 7.57 (ddd, *J* = 5.2, 3.5, 2.5 Hz, 4H), 7.49 – 7.44 (m, 2H), 7.37 (ddd, *J* = 7.5, 3.9, 1.0 Hz, 1H), 7.18 – 7.12 (m, 2H); <sup>13</sup>C NMR (126 MHz, CDCl<sub>3</sub>) δ 162.4 (d, *J*<sub>C-F</sub> = 246.2 Hz), 140.2, 137.3 (d, *J*<sub>C-F</sub> = 3.2 Hz), 128.8, 128.7 (d, *J*<sub>C-F</sub> = 8.0 Hz), 127., 127.0, 115.6 (d, *J*<sub>C-F</sub> = 21.4 Hz); <sup>19</sup>F NMR (471 MHz, CDCl<sub>3</sub>) δ -115.8.

#### Dibromo(p-tolyl)borane (**7**)

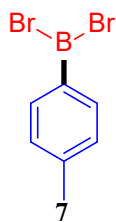

In a glovebox, a flame-dried reaction tube (35 mL) equipped with a magnetic stir bar was charged with **3g** (57.0 μL, 0.3 mmol), BBr<sub>3</sub> (32.0 μL, 0.33 mmol), pentane (0.25 mL) before being sealed with a rubber septum. The resulting mixture was stirred at 50 °C for 5 h. After the mixture was cooled to room temperature, the solvent was evaporated in vacuo to give the product **7** (57.0 mg, 73%); The spectral data were in accordance with those reported in the literature<sup>17</sup>; <sup>1</sup>H NMR (500 MHz, CDCl<sub>3</sub>) δ 8.13 (d, *J* = 7.7 Hz, 2H), 7.32 (d, *J* = 7.6 Hz, 2H), 2.45 (s, 3H); <sup>13</sup>C NMR (126 MHz, CDCl<sub>3</sub>) δ 142.9, 135.7, 128.8, 21.9.

## 6. The Selective Transformations of the C–Br and C–NO<sub>2</sub> Bonds

### 1-(4-(trimethylsilyl)phenyl)piperidine (**8**)

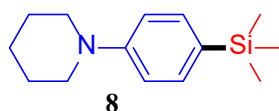

In a glovebox, a flame-dried reaction tube (35 mL) equipped with a magnetic stir bar was charged with 1-bromo-4-nitrobenzene (60.6 mg, 0.3 mmol), piperidine (30  $\mu$ L, 0.3 mmol), Pd(acac)<sub>2</sub> (5.0 mol%), BrettPhos (15 mol%), Cs<sub>2</sub>CO<sub>3</sub> (3.0 equiv.), PhCF<sub>3</sub> (1.0 mL) before being sealed with a rubber septum. The reaction mixture was stirred at 100 °C for 24 hours. After through flash column chromatography on silica gel (petroleum ether/EtOAc=50:1) to give the intermediate product, then the reaction was carried out according to the standard conditions of denitrative silylation to afford the **8** in 82% yield. The spectral data were in accordance with those reported in the literature<sup>18</sup>; <sup>1</sup>H NMR (500 MHz, CDCl<sub>3</sub>)  $\delta$  7.41 (d, *J* = 8.6 Hz, 2H), 6.93 (d, *J* = 8.6 Hz, 2H), 3.24 – 3.16 (m, 4H), 1.70 (dt, *J* = 11.3, 5.7 Hz, 4H), 1.60 (dd, *J* = 11.3, 5.8 Hz, 2H), 0.24 (s, 9H); <sup>13</sup>C NMR (126 MHz, CDCl<sub>3</sub>)  $\delta$  152.4, 134.3, 128.6, 115.4, 50.0, 25.8, 24.4, -0.9.

### Trimethyl(4'-methyl-[1,1'-biphenyl]-4-yl)silane(**9**).

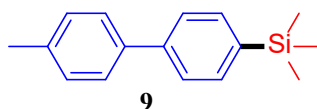

In a glovebox, a flame-dried reaction tube (35 mL) equipped with a magnetic stir bar was charged with 1-bromo-4-nitrobenzene (60.6 mg, 0.3 mmol), p-tolylboronic acid (40.8mg, 0.3 mmol), Pd(acac)<sub>2</sub> (5.0 mol%), BrettPhos (15 mol%), Cs<sub>2</sub>CO<sub>3</sub> (3.0 equiv.), PhCF<sub>3</sub> (1.0 mL) before being sealed with a rubber septum. The reaction mixture was stirred at 100 °C for 24 hours. After through flash column chromatography on silica gel (petroleum ether/EtOAc=100:1) to give the intermediate product, then the reaction was carried out according to the standard conditions of denitrative silylation to afford the **9** in 63% yield. The spectral data were in accordance with those reported in the literature<sup>19</sup>; <sup>1</sup>H NMR (500 MHz, CDCl<sub>3</sub>)  $\delta$  7.68 – 7.56 (m, 4H), 7.53 (d, *J* = 8.1 Hz, 2H), 7.32 – 7.17 (m, 2H), 2.43 (s, 3H), 0.33 (s, 9H); <sup>13</sup>C NMR (126 MHz, CDCl<sub>3</sub>)  $\delta$  141.5, 138.8, 138.3, 137.1, 133.8, 129.5, 127.0, 126.3, 21.1, -1.1.

## 7. 1 mmol Scale Experiments

In a glovebox, a flame-dried reaction tube (35 mL) equipped with a magnetic stir bar was charged with Pd(acac)<sub>2</sub> (15.5 mg, 5 mol%), BrettPhos (80.5 mg, 15 mol%), 1-methoxy-4-nitrobenzene **1a** (1.5 mmol) or 1-methyl-4-nitrobenzene or 1,2-dimethoxy-4-nitrobenzene, hexamethyldisilane **2** (1.0 mmol) and Cs<sub>2</sub>CO<sub>3</sub> (4.0 mmol) before being sealed with a rubber septum. The reaction mixture was stirred at 150 °C for 24 hours. After the mixture was cooled to room temperature, the resulting solution was directly filtered. The solvent was evaporated in vacuo to give the crude products. The residue was purified by flash column chromatography on silica gel (petroleum ether/ethyl acetate) to give the desired product **3a** (170.0 mg, 94%), **3g** (113.0 mg, 69%), and **3b** (185.0 mg, 88%).

## 8. References

1. Tobisu, M.; Kita, Y.; Ano, Y.; Chatani, N., Rhodium-Catalyzed Silylation and Intramolecular Arylation of Nitriles via the Silicon-Assisted Cleavage of Carbon–Cyano Bonds. *Journal of the American Chemical Society* **2008**, *130*, 15982-15989.
2. Stephenson, G. R.; Anson, C. E.; Malkov, A. V.; Roe, C., Influencing the Balance between ipso and  $\omega$  Nucleophile Addition to (1-Arylcyclohexadienyl) iron Intermediates in Alkaloid Synthesis. *European Journal of Organic Chemistry* **2012**, *2012*, 4716-4732.
3. Zhai, Y.; Chen, X.; Zhou, W.; Fan, M.; Lai, Y.; Ma, D., Copper-Catalyzed Diaryl Ether Formation from (Hetero)aryl Halides at Low Catalytic Loadings. *The Journal of Organic Chemistry* **2017**, *82*, 4964-4969.
4. Harper, M. J.; Emmett, E. J.; Bower, J. F.; Russell, C. A., Oxidative 1,2-Difunctionalization of Ethylene via Gold-Catalyzed Oxyarylation. *Journal of the American Chemical Society* **2017**, *139*, 12386-12389.
5. Deck, Paul; A.; Beswick; Colin; L.; Marks; Tobin; Society, J. J. J. o. t. A. C., Highly Electrophilic Olefin Polymerization Catalysts. Quantitative Reaction Coordinates for Fluoroarylborane/Alumoxane Methide Abstraction and Ion-Pair Reorganization in Group 4 Metallocene and “Constrained Geometry” Catalysts. *Journal of the American Chemical Society* **1998** *120*, 1772-1784.
6. Kim, H. U.; Park, O. Y.; Park, J. B.; Hwang, D.-H., Trimethylsilyl O-Xylenyl-Substituted Fullerene Bis-Adduct as Electron Acceptor for Solution-Processed Polymer Solar Cells. *Journal of Nanoscience and Nanotechnology* **2016**, *16*, 10465-10469.
7. Mahoney, S. J.; Lou, T.; Bondarenko, G.; Fillion, E., Carbon-Based Leaving Group in Substitution Reactions: Functionalization of  $sp^3$ -Hybridized Quaternary and Tertiary Benzylic Carbon Centers. *Organic Letters* **2012**, *14*, 3474-3477.
8. Kim, M.; Chang, S., Rhodium (NHC)-Catalyzed Amination of Aryl Bromides. *Organic Letters* **2010**, *12*, 1640-1643.
9. Han, W.-S.; Son, H.-J.; Wee, K.-R.; Min, K.-T.; Kwon, S.; Suh, I.-H.; Choi, S.-H.; Jung, D. H.; Kang, S. O., Silicon-Based Blue Phosphorescence Host Materials: Structure and Photophysical Property Relationship on Methyl/Phenylsilanes Adorned with 4-(*N*-Carbazolyl)phenyl Groups and Optimization of Their Electroluminescence by Peripheral 4-(*N*-Carbazolyl)phenyl Numbers. *The Journal of Physical Chemistry C* **2009**, *113*, 19686-19693.
10. Deally, A.; Hackenberg, F.; Lally, G.; Müller-Bunz, H.; Tacke, M., Synthesis and Cytotoxicity Studies of Silyl-Substituted Titanocene Dichloride Derivatives. *Organometallics* **2012**, *31*, 5782-5790.
11. Yamagishi, H.; Saito, H.; Shimokawa, J.; Yorimitsu, H., Design, Synthesis, and Implementation of Sodium Silylsilanolates as Silyl Transfer Reagents. *ACS Catalysis* **2021**, *11*, 10095-10103.
12. Fukuda, J. I.; Nogi, K.; Yorimitsu, H., Cross-Coupling of Aryl Trifluoromethyl Sulfones with Arylboronates by Cooperative Palladium/Rhodium Catalysis. *Organic Letters* **2019**, *21*, 8987-8991.
13. Yorimitsu, H.; Ozaki, T.; Kaga, A.; Saito, H., Generation of Aryllithium Reagents from *N*-Arylpyrroles Using Lithium. *Synthesis* **2021**, *53*, 3019-3028.
14. Cepanec, I.; Litvić, M.; Udiković, J.; Pogorelić, I.; Lovrić, M., Copper(I)-Catalysed Homo-Coupling of Aryldiazonium Salts: Synthesis of Symmetrical Biaryls. *Tetrahedron* **2007**, *63*, 5614-5621.
15. Miki, Y.; Hamamoto, H.; Hattori, S.; Takemaru, K., Hypervalent Iodine (III)-LiX Combination in

- Fluoroalcohol Solvent for Aromatic Halogenation of Electron-Rich Arenecarboxylic Acids. *Synlett* **2011**, *2011*, 1563-1566.
16. Bhat K, S.; Lanke, V.; Prasad, J. D.; Prabhu, K. R., Ligand-free Suzuki Coupling Reaction with Highly Recyclable Ionic Palladium Catalyst,  $Ti_{1-x}Pd_xO_{2-x}$  ( $x = 0.03$ ). *Applied Catalysis A: General* **2020**, *596*, 117516.
  17. Haberecht, M. C.; Heilmann, J. B.; Haghiri, A.; Bolte, M.; Bats, J. W.; Lerner, H.-W.; Holthausen, M. C.; Wagner, M., Multiply Borylated Arenes: X-ray Crystal Structure Analyses and Quantum Chemical Calculations. *Zeitschrift für anorganische und allgemeine Chemie* **2004**, *630*, 904-913.
  18. Svejstrup, T. D.; Ruffoni, A.; Julia, F.; Aubert, V. M.; Leonori, D., Synthesis of Arylamines via Aminium Radicals. *Angewandte Chemie International Edition* **2017**, *56*, 14948-14952.
  19. Kamio, S.; Kageyuki, I.; Osaka, I.; Yoshida, H., Anthranilamide (aam)-substituted arylboranes in direct carbon-carbon bond-forming reactions. *Chemical Communications* **2019**, *55*, 2624-2627.

## 9. NMR Spectra of Products and Derivatives

### <sup>1</sup>H NMR Spectrum of **3a**

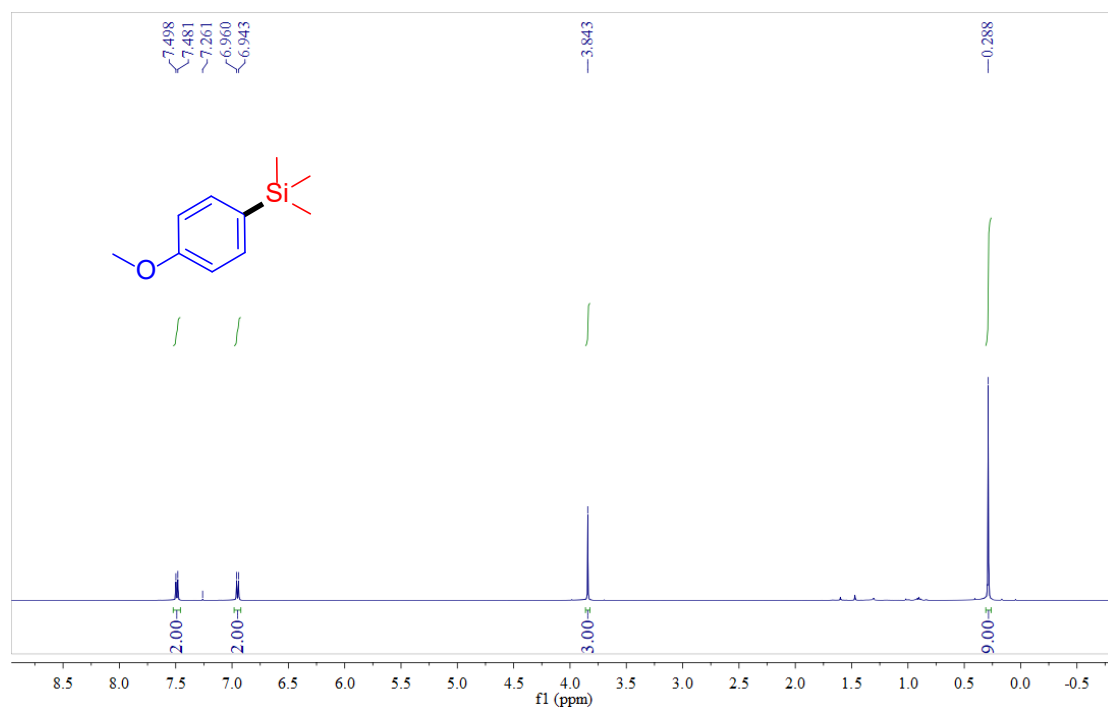

### <sup>13</sup>C NMR Spectrum of **3a**

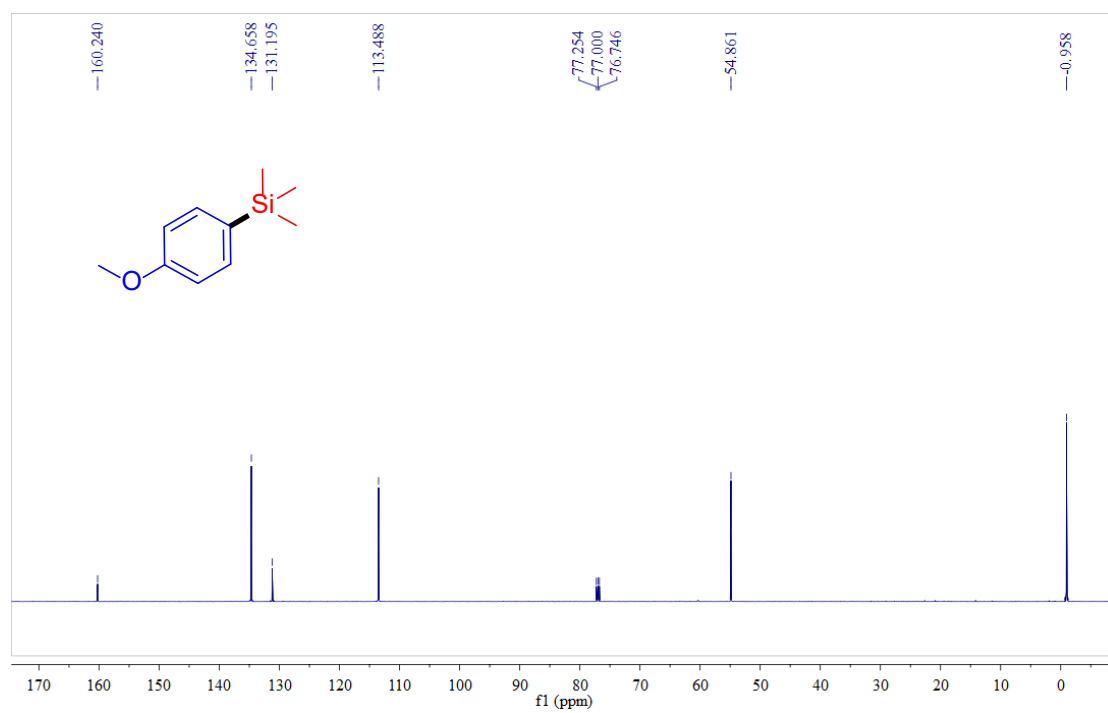

### <sup>1</sup>H NMR Spectrum of **3b**

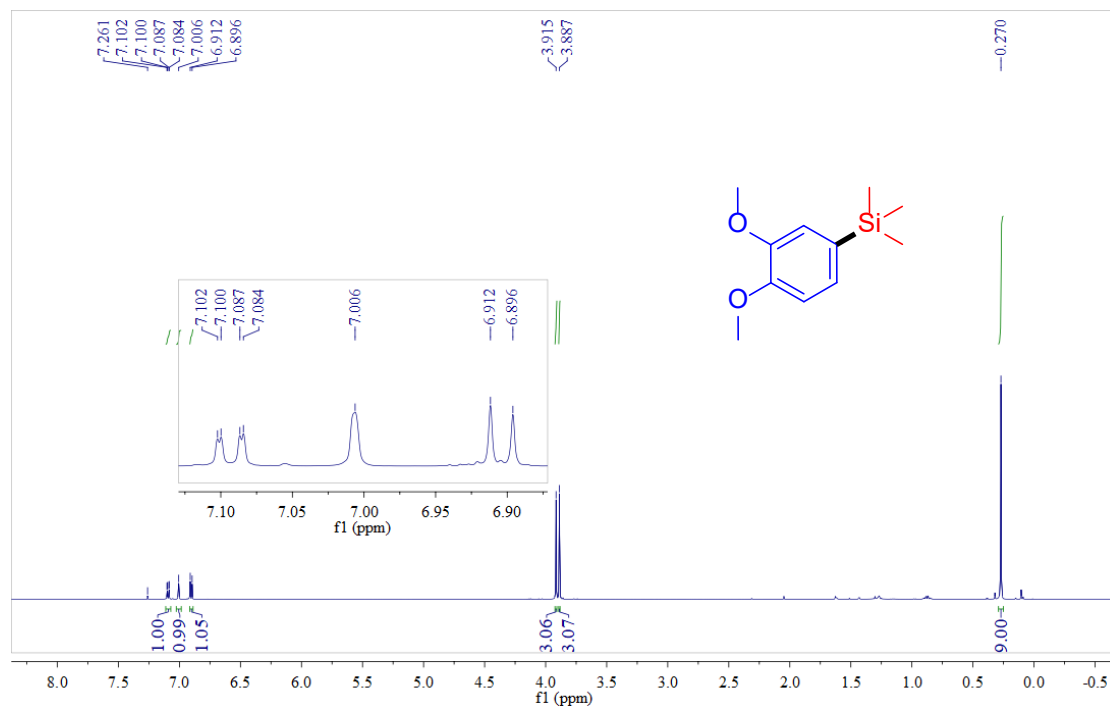

### <sup>13</sup>C NMR Spectrum of **3b**

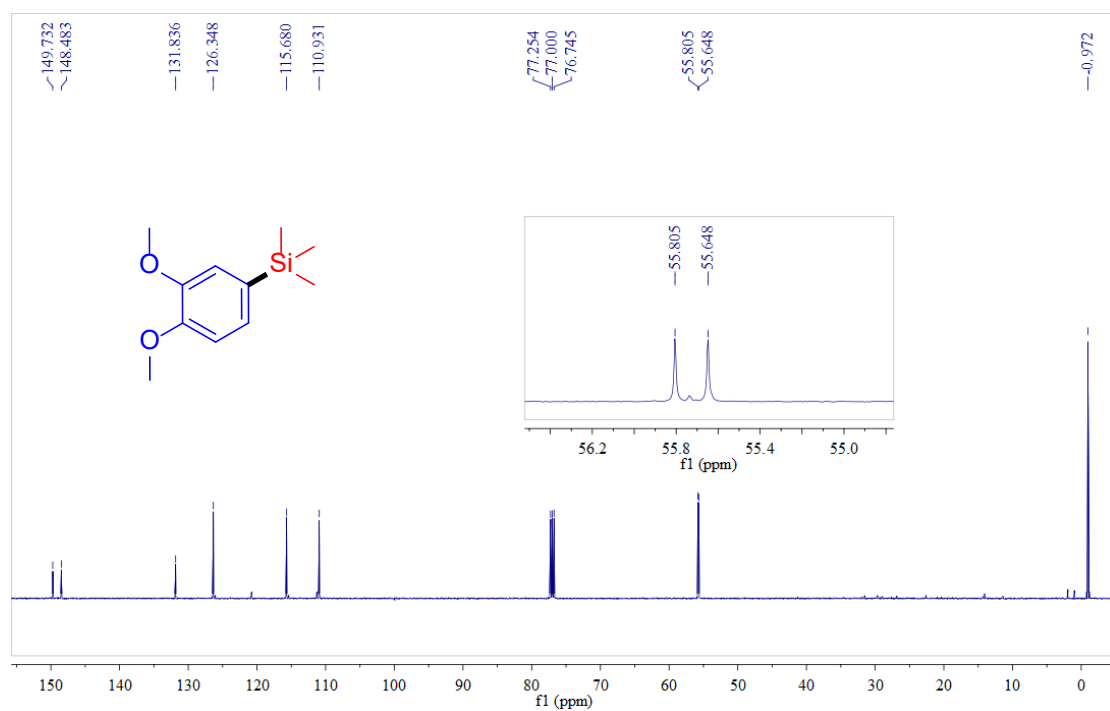

### <sup>1</sup>H NMR Spectrum of 3c

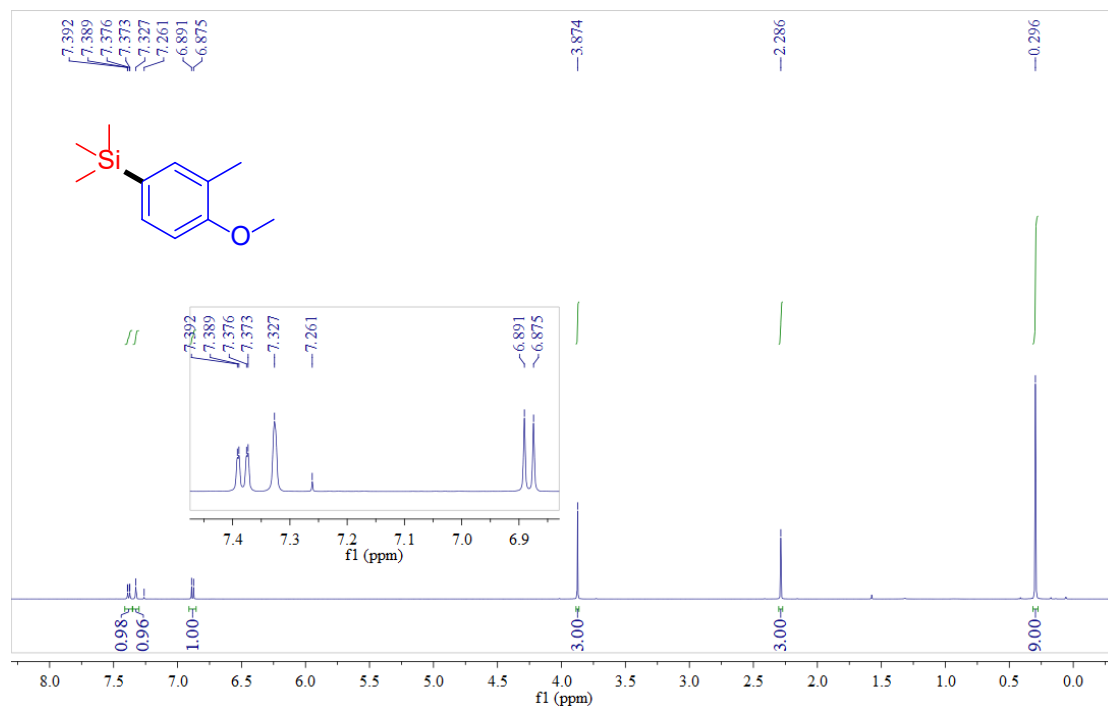

### <sup>13</sup>C NMR Spectrum of 3c

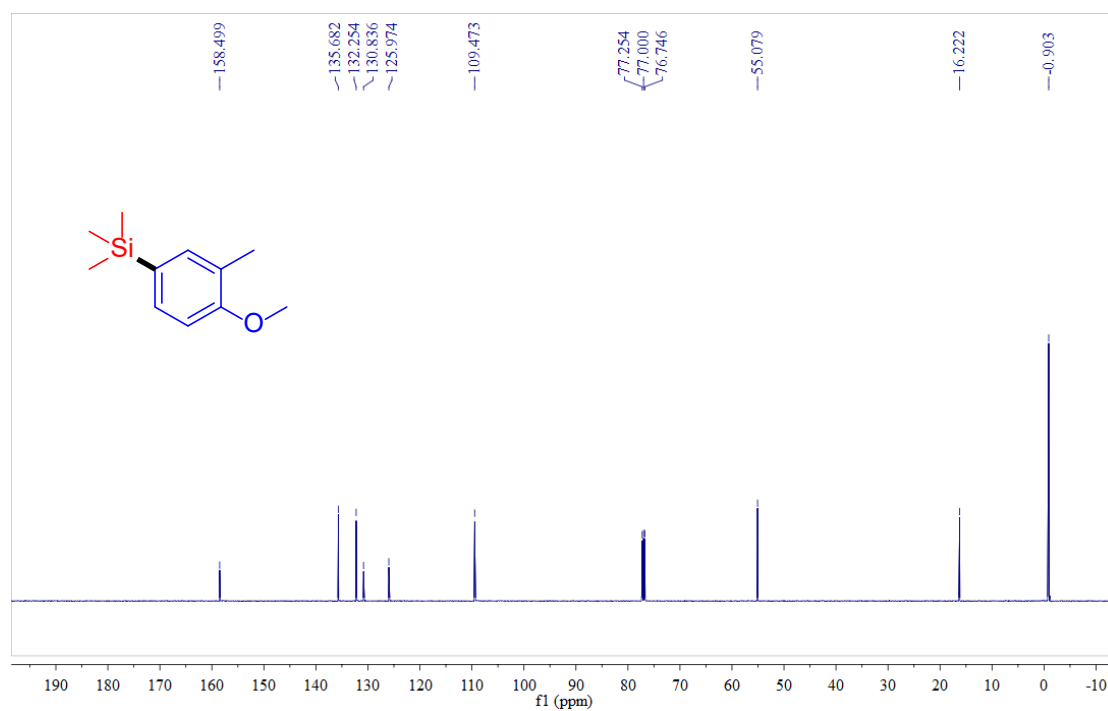



### <sup>1</sup>H NMR Spectrum of **3d**

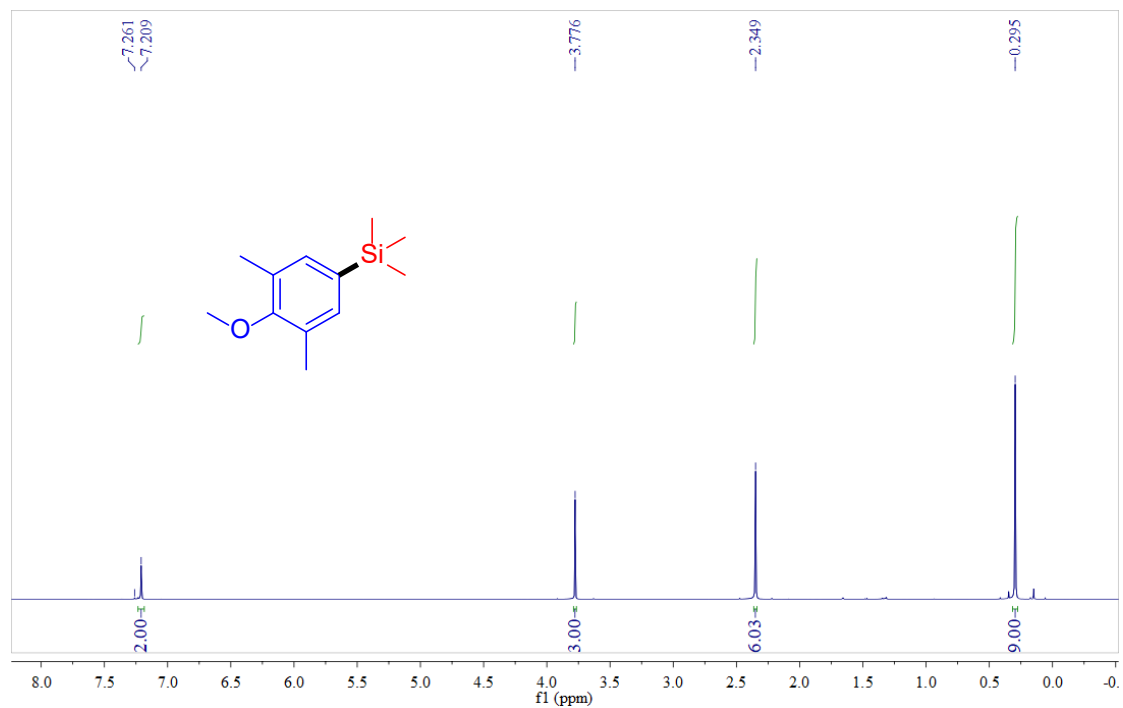

### <sup>13</sup>C NMR Spectrum of **3d**

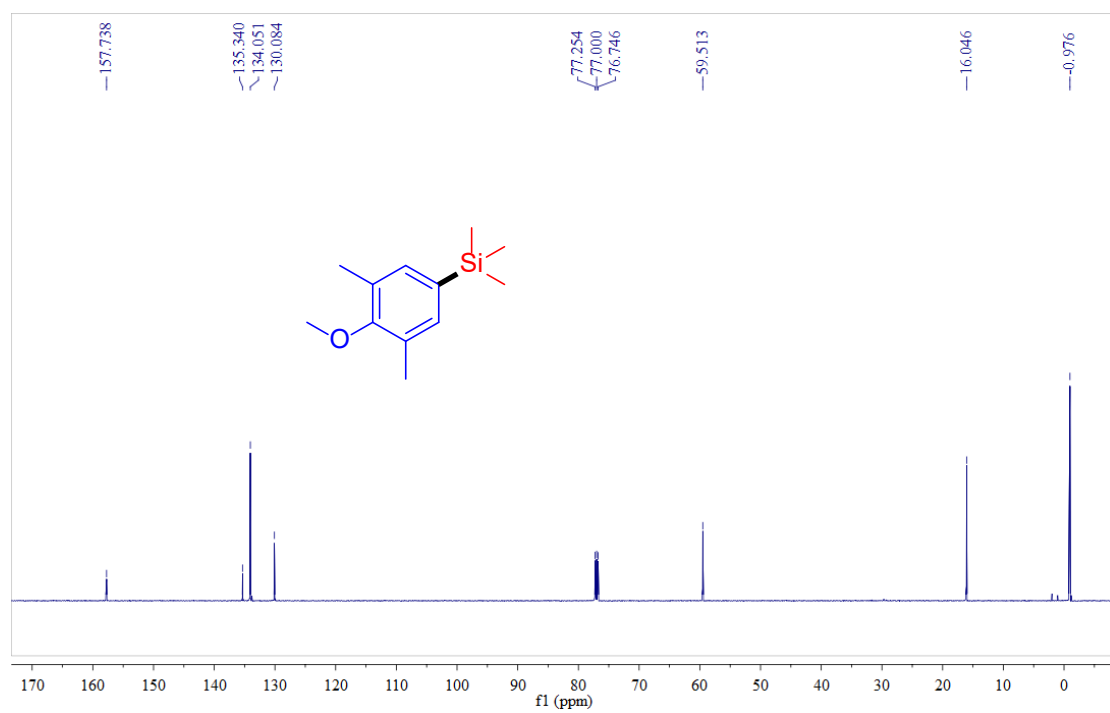

### <sup>1</sup>H NMR Spectrum of 3e

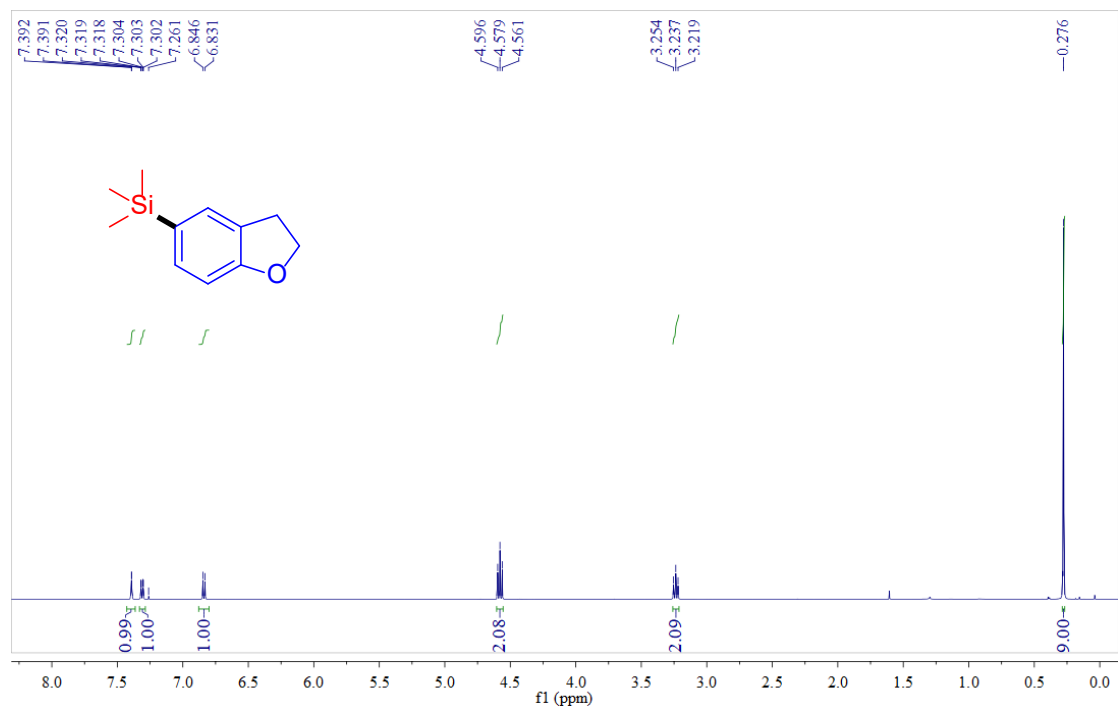

### <sup>13</sup>C NMR Spectrum of 3e

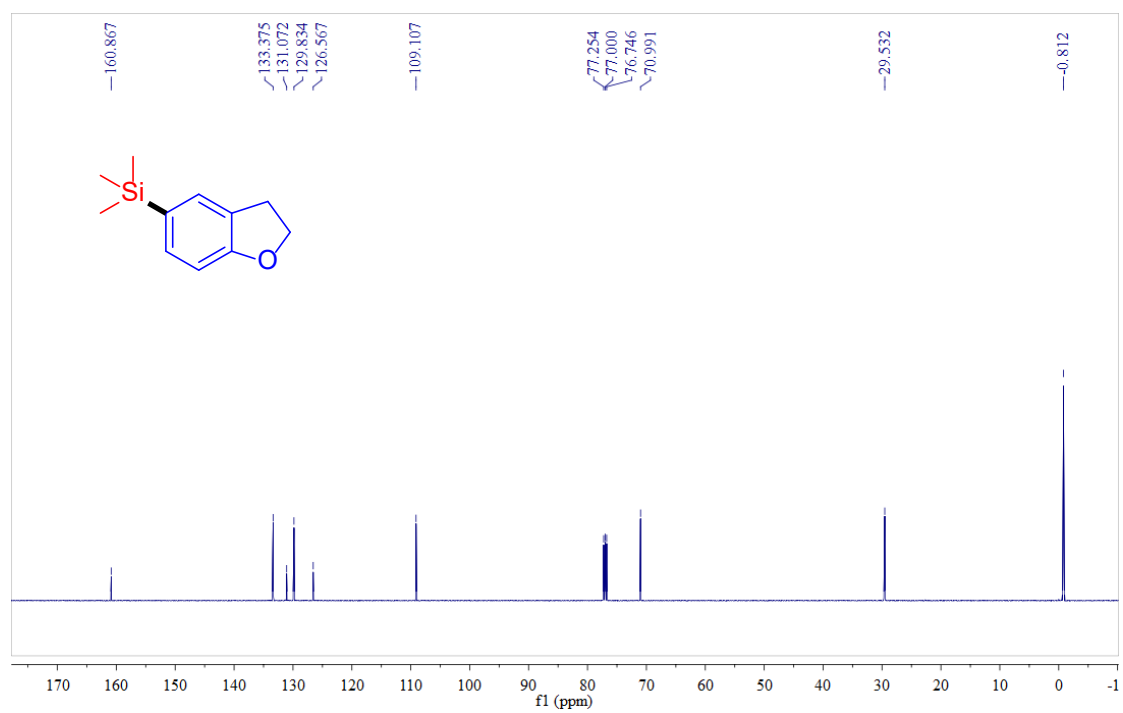

### <sup>1</sup>H NMR Spectrum of **3f**

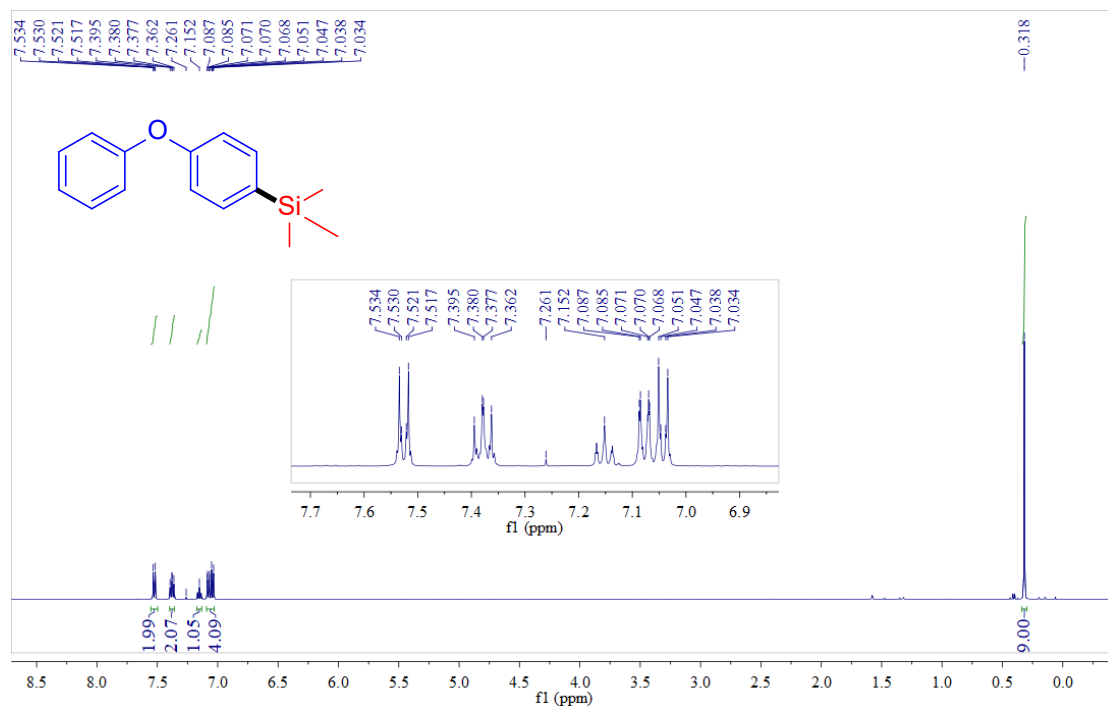

### <sup>13</sup>C NMR Spectrum of **3f**

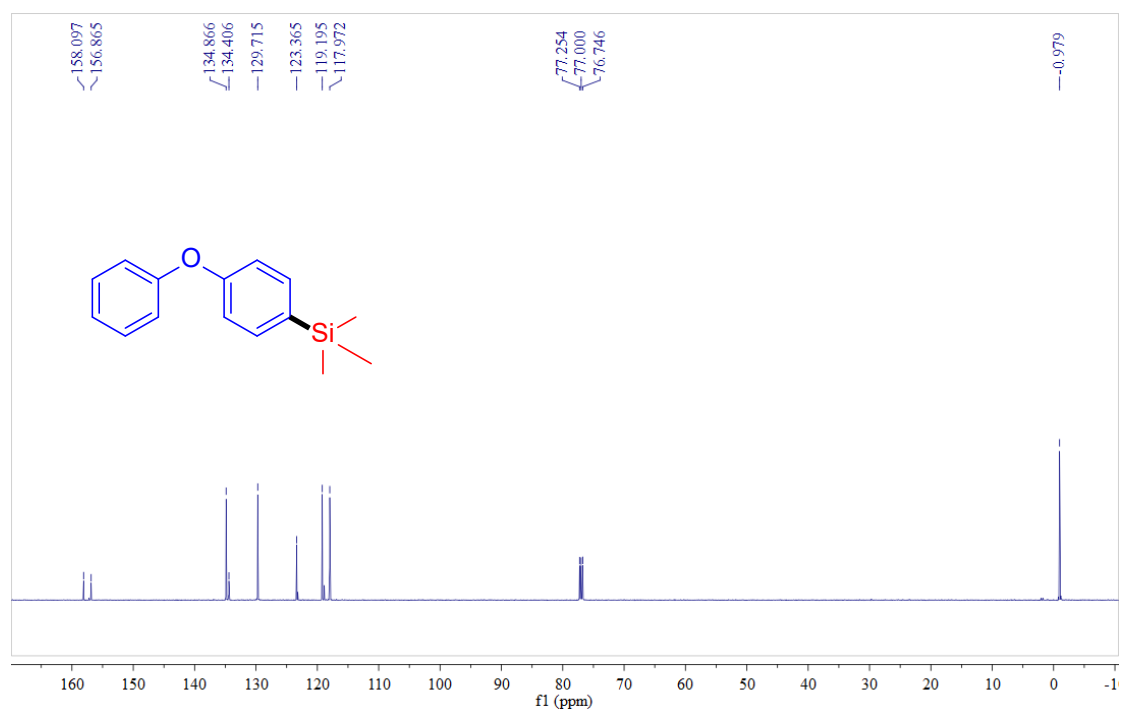

### <sup>1</sup>H NMR Spectrum of **3g**

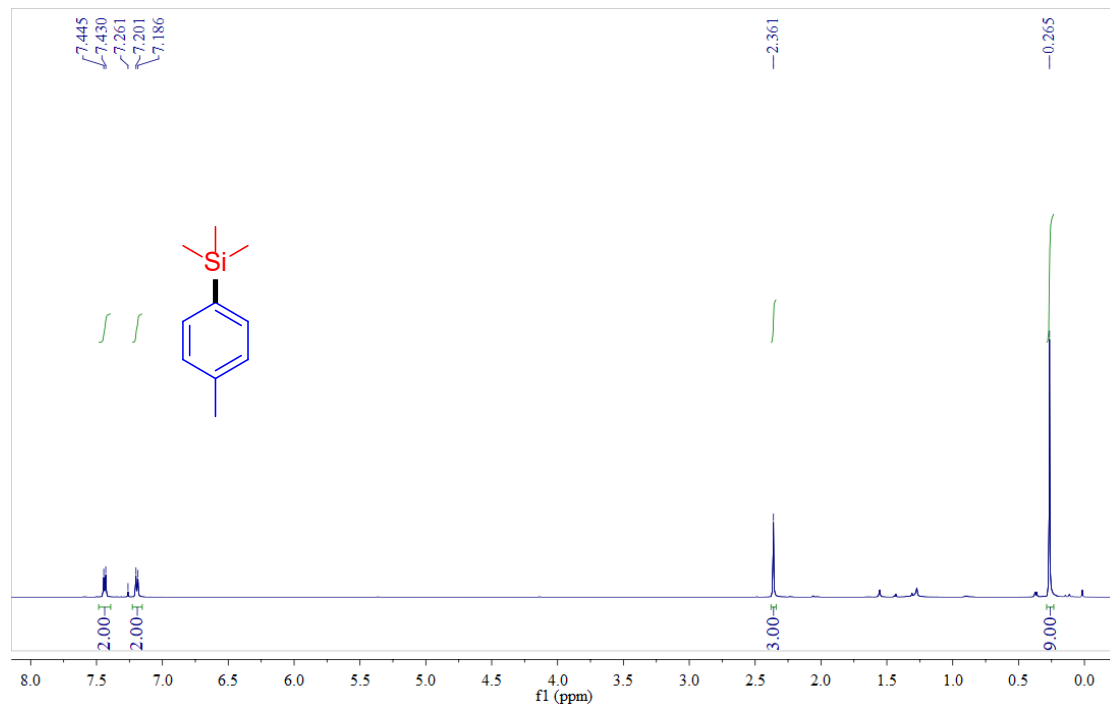

### <sup>13</sup>C NMR Spectrum of **3g**

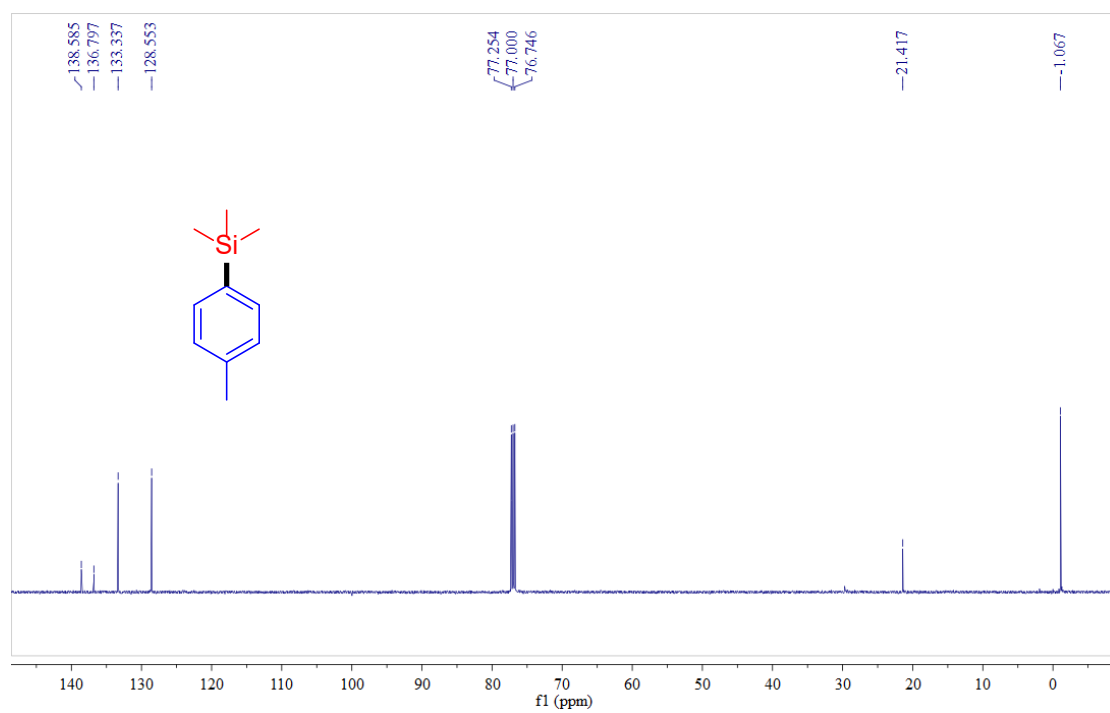

### <sup>1</sup>H NMR Spectrum of **3h**

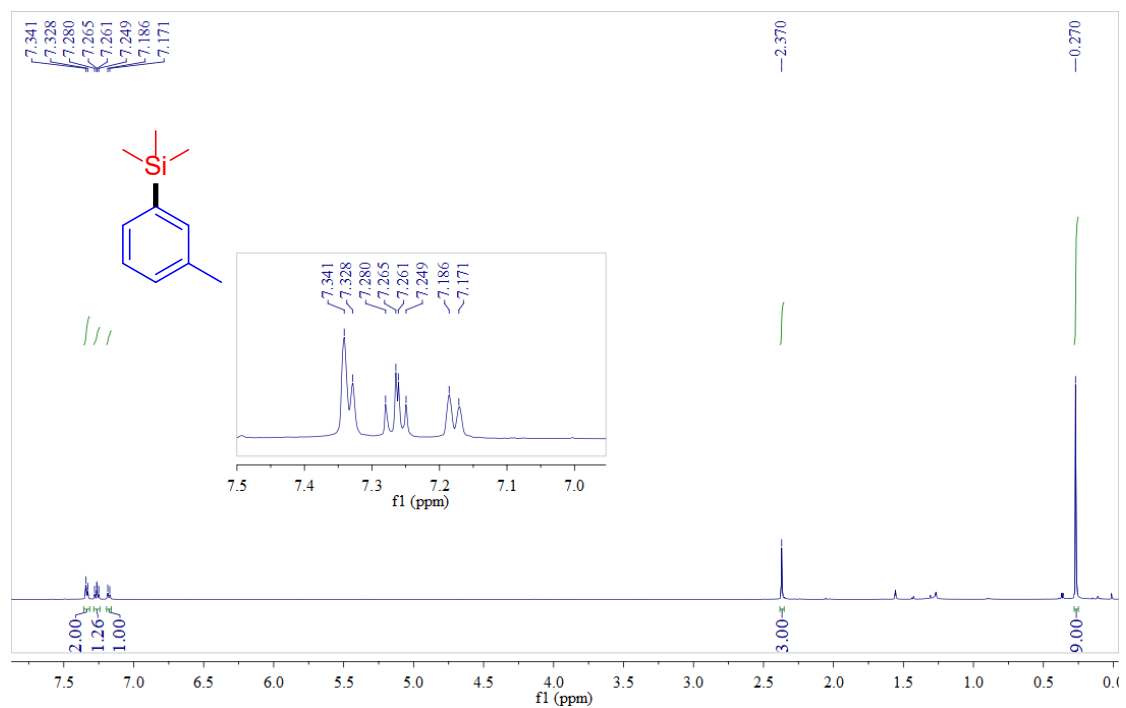

### <sup>13</sup>C NMR Spectrum of **3h**

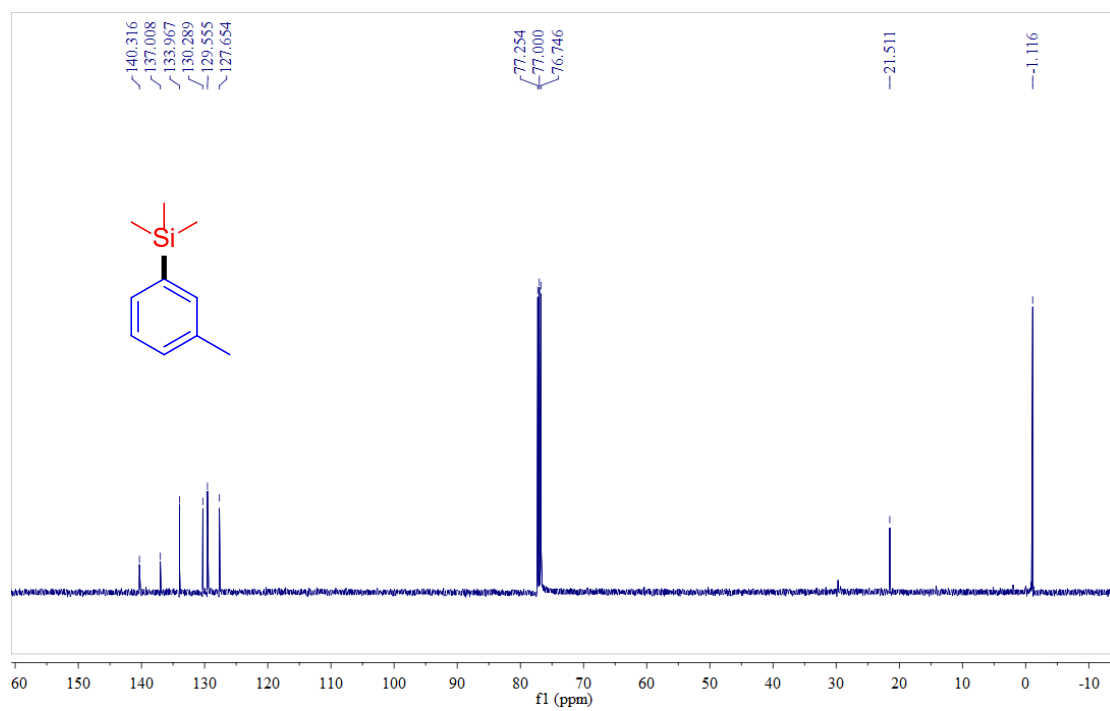

### $^1\text{H}$ NMR Spectrum of **3i**

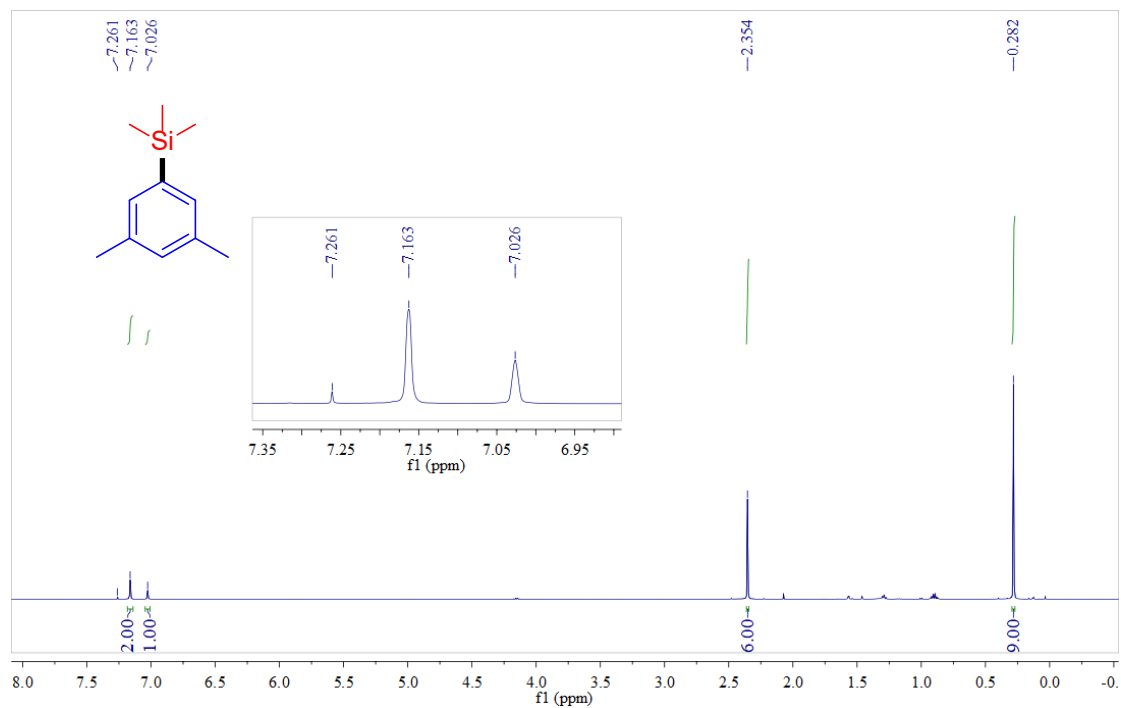

### $^{13}\text{C}$ NMR Spectrum of **3i**

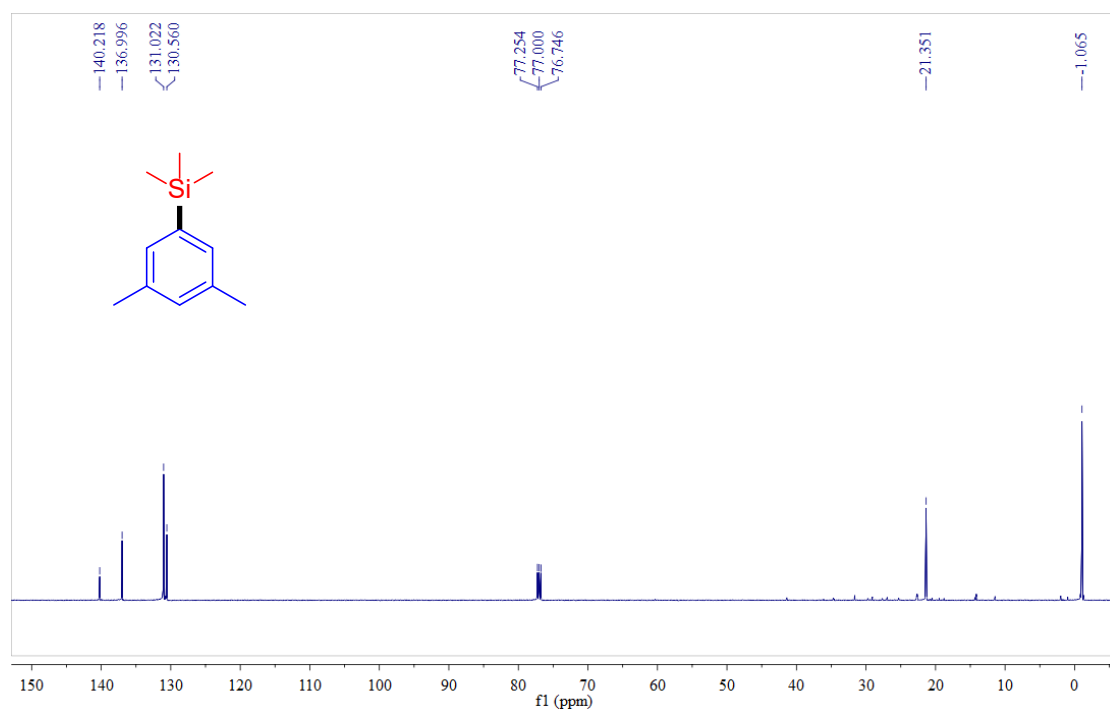

### <sup>1</sup>H NMR Spectrum of **3j**

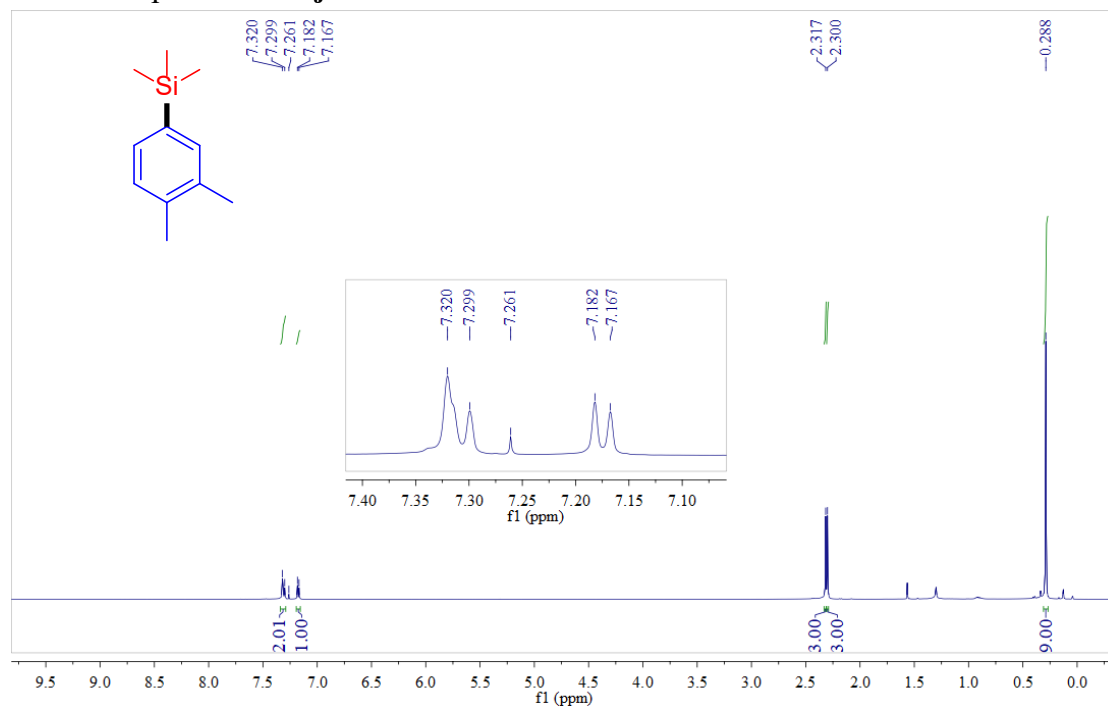

### <sup>13</sup>C NMR Spectrum of **3j**

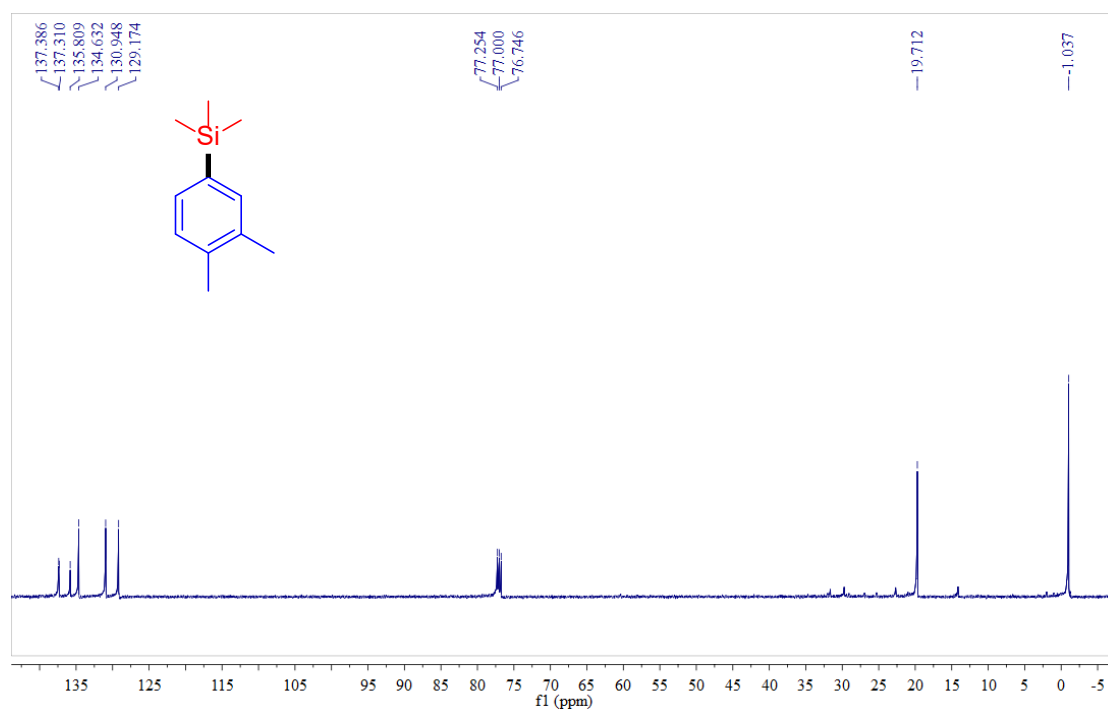

### <sup>1</sup>H NMR Spectrum of **3k**

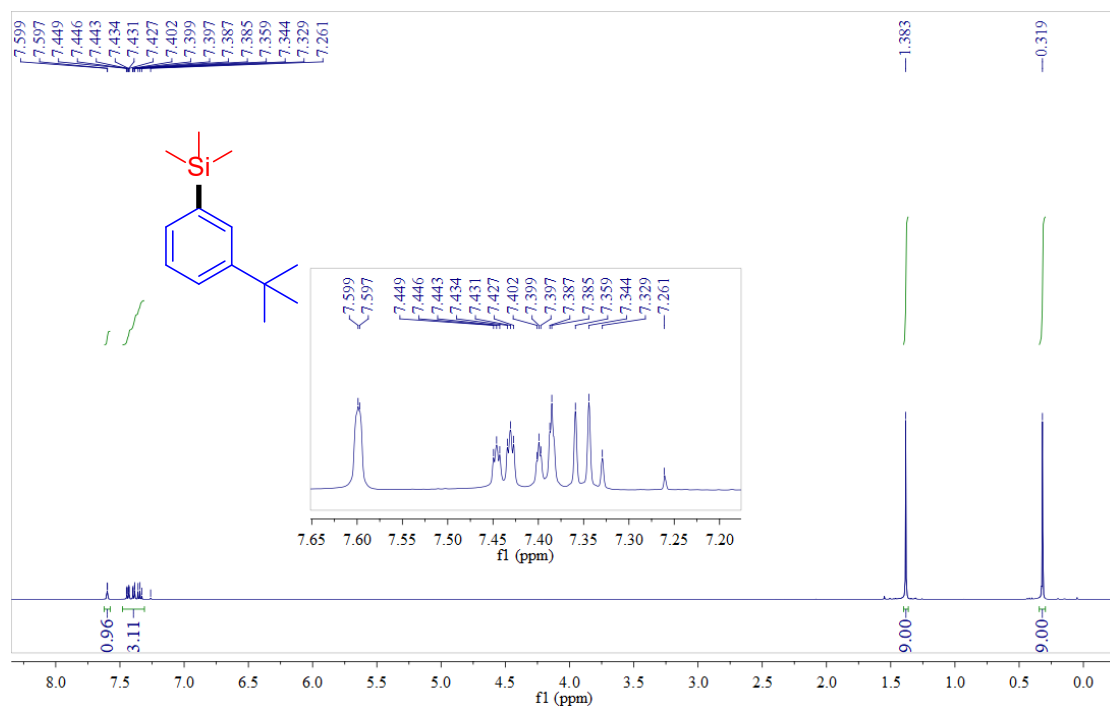

### <sup>13</sup>C NMR Spectrum of **3k**

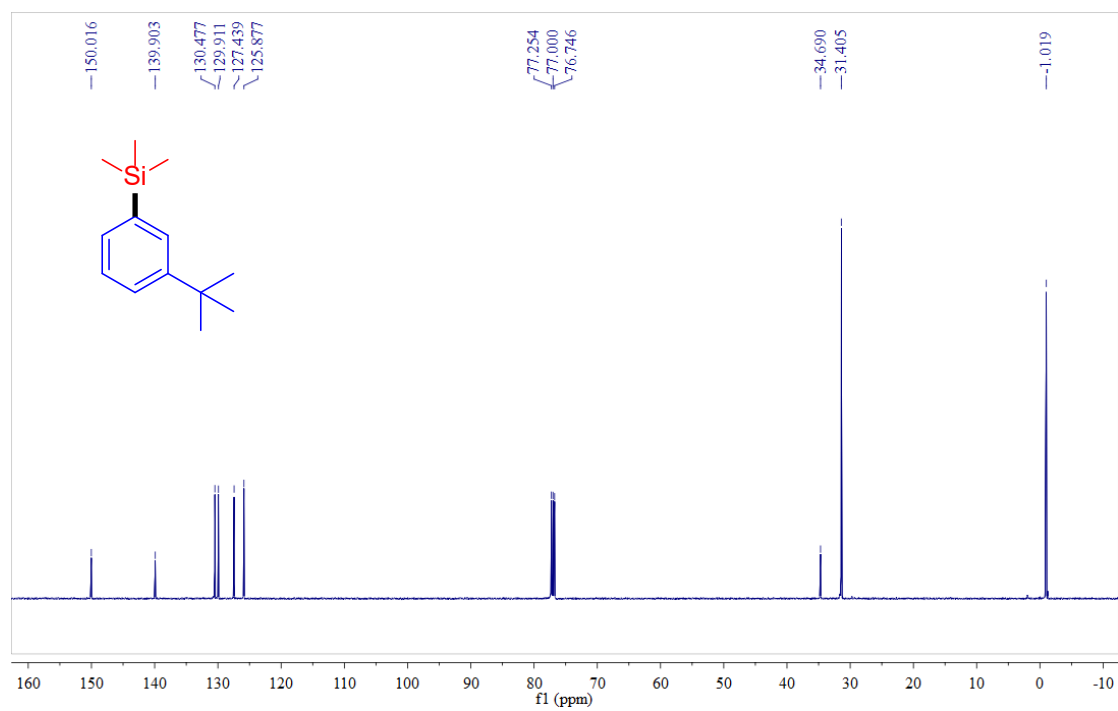



### <sup>1</sup>H NMR Spectrum of **31**

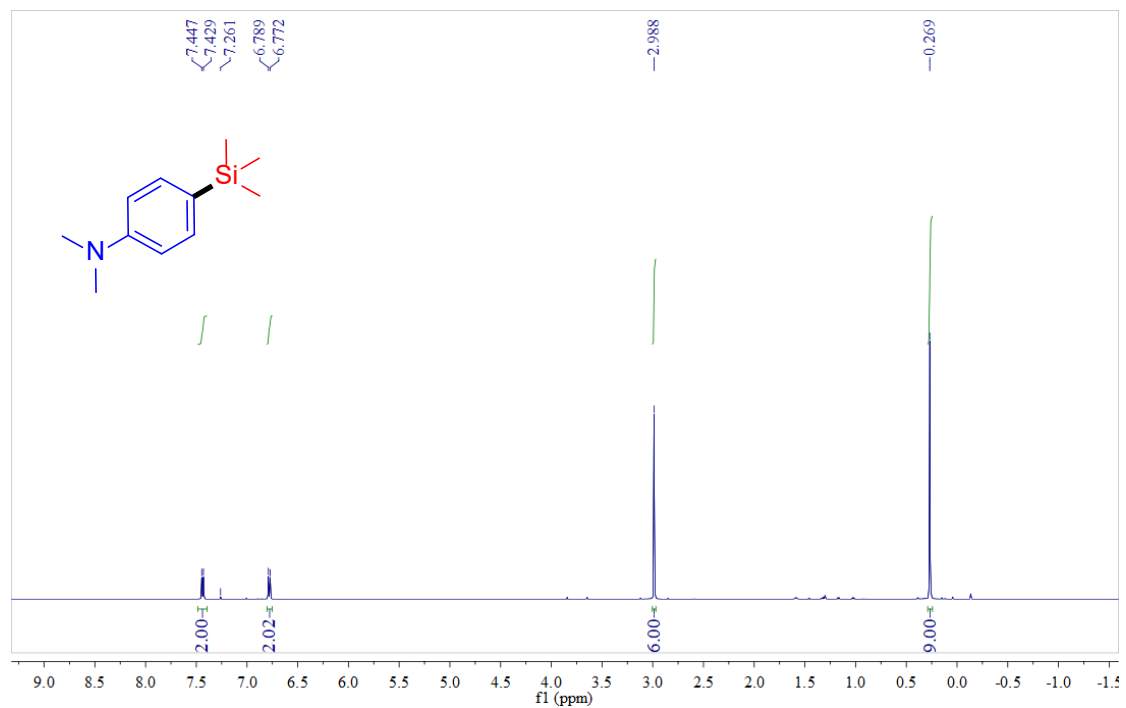

### <sup>13</sup>C NMR Spectrum of **31**

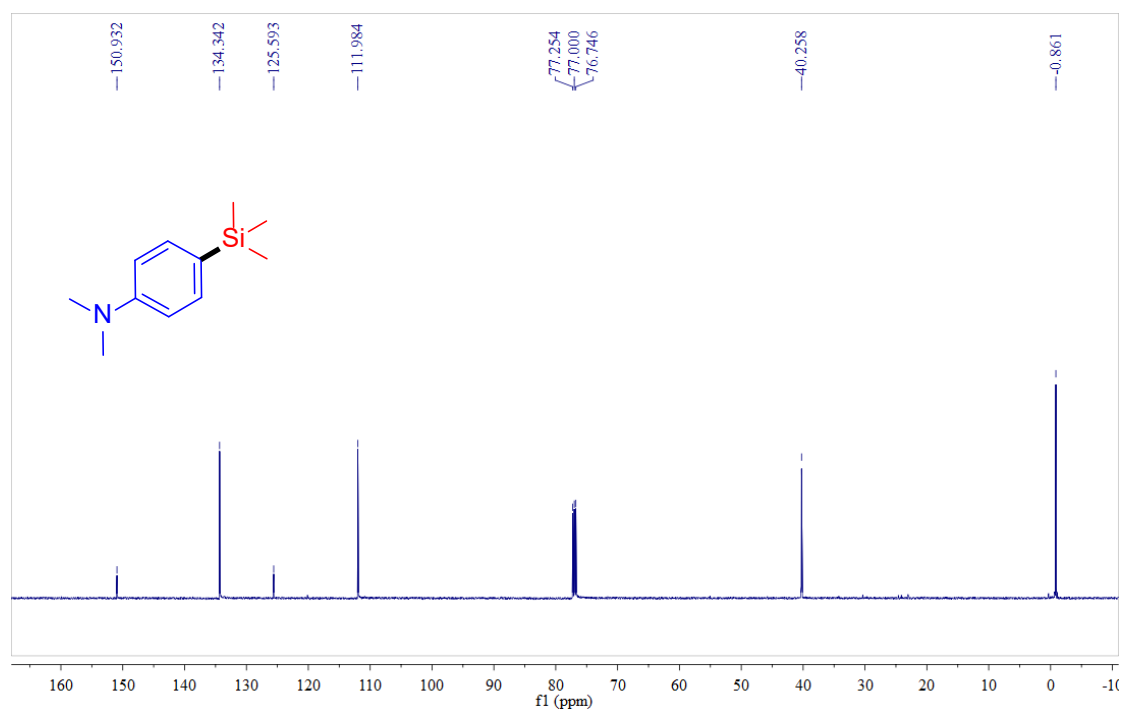

### $^1\text{H}$ NMR Spectrum of **3m**

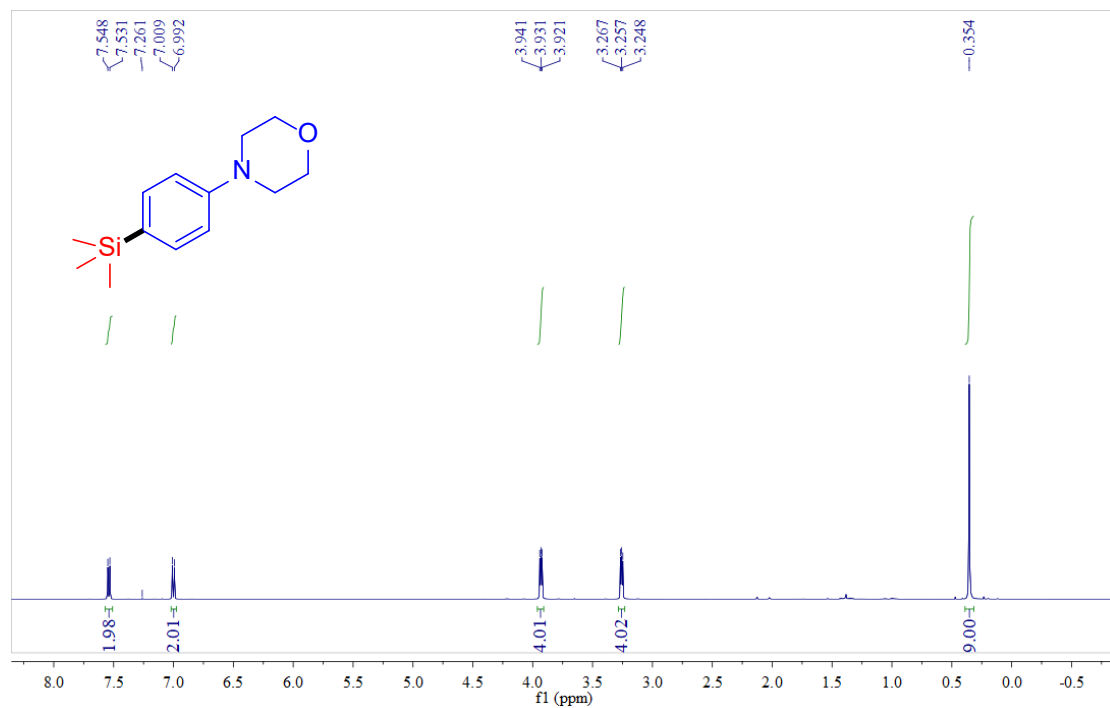

### $^{13}\text{C}$ NMR Spectrum of **3m**

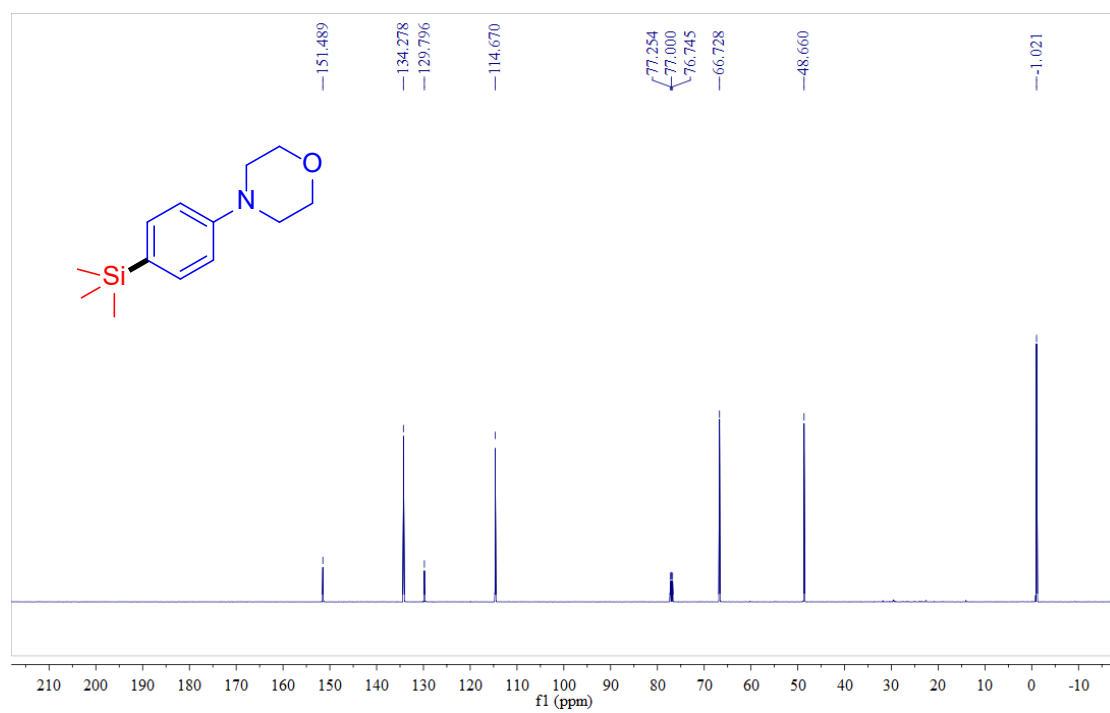

### <sup>1</sup>H NMR Spectrum of **3n**

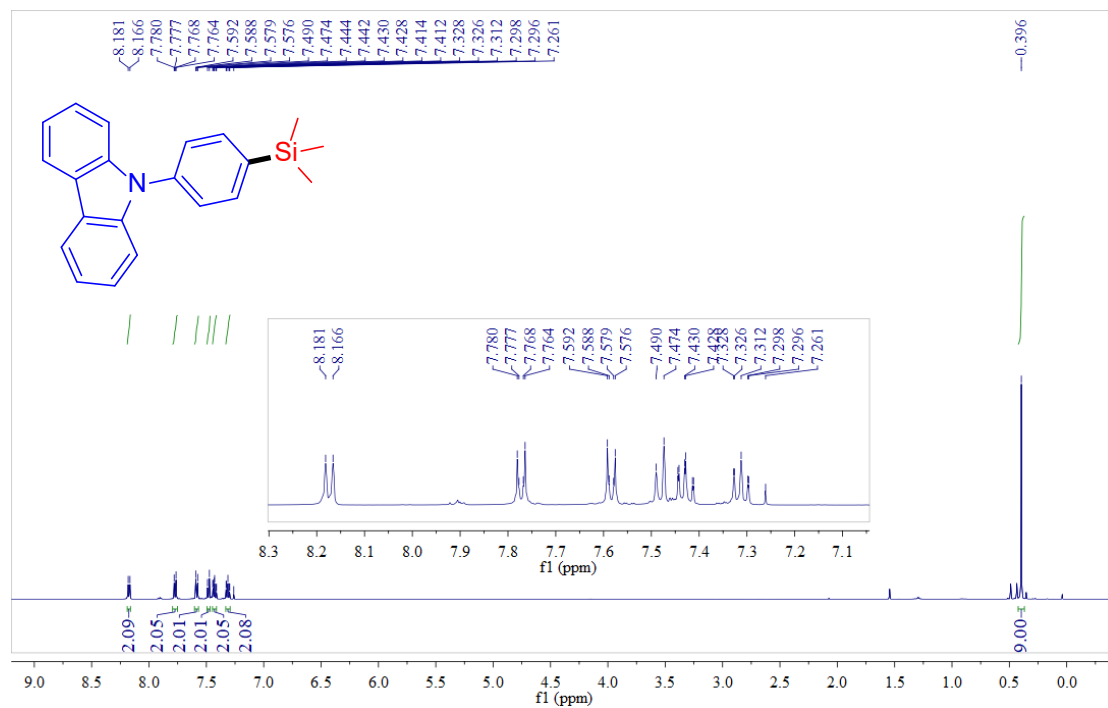

### <sup>13</sup>C NMR Spectrum of **3n**

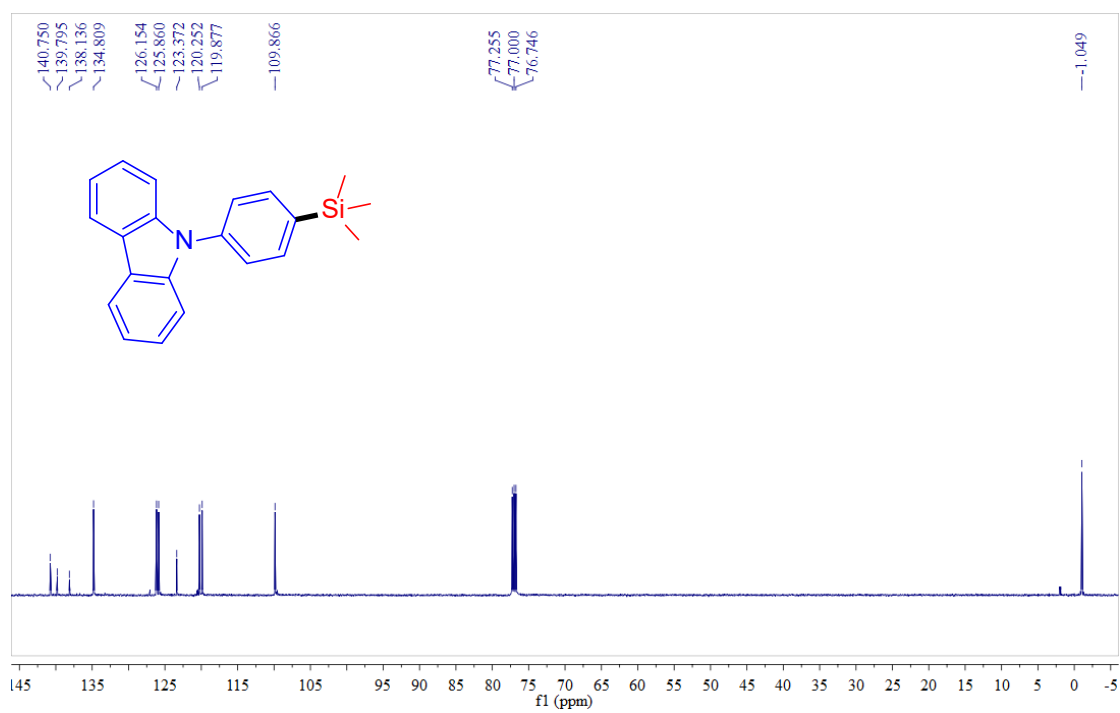

### <sup>1</sup>H NMR Spectrum of **30**

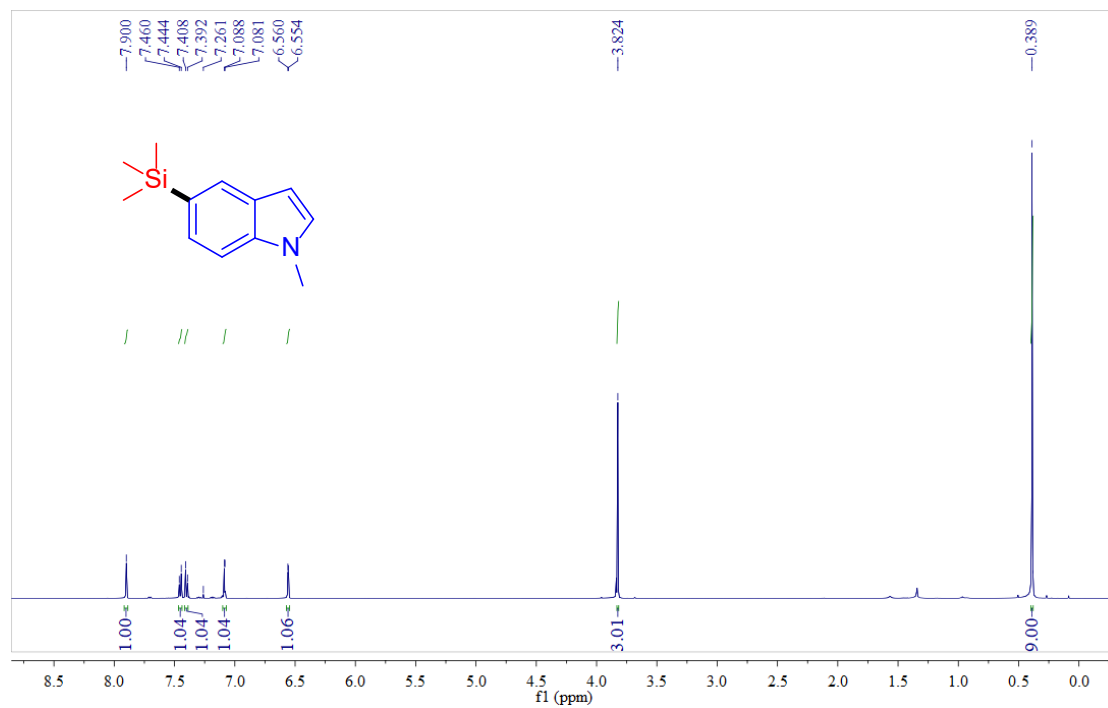

### <sup>13</sup>C NMR Spectrum of **30**

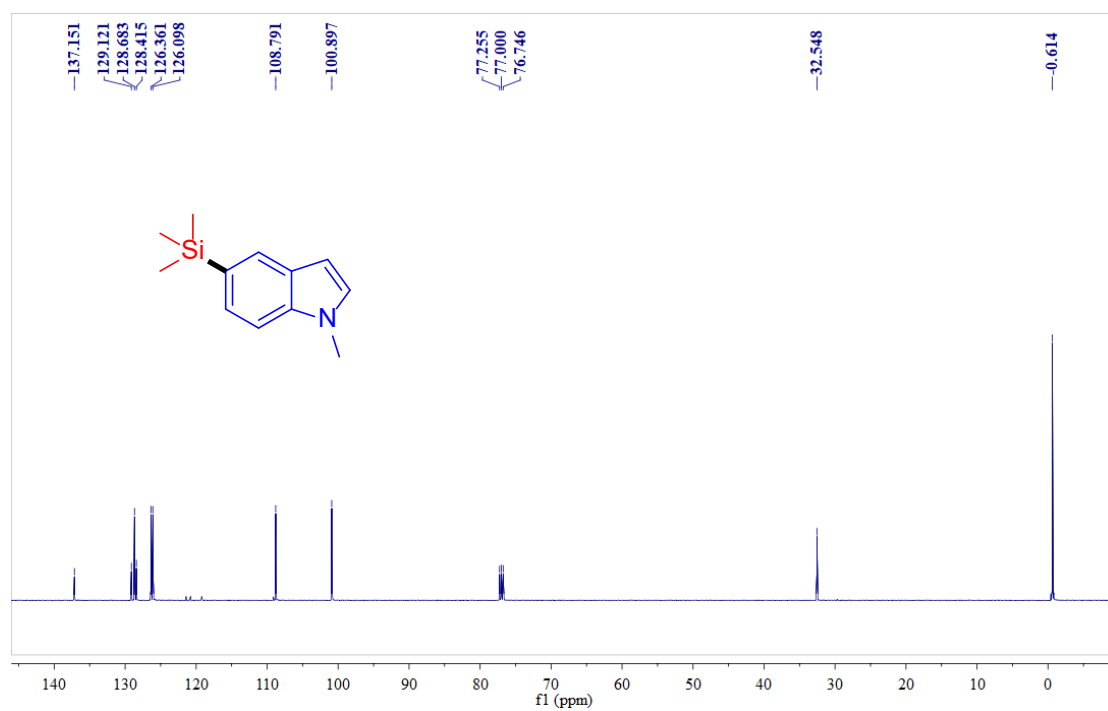

### <sup>1</sup>H NMR Spectrum of 3p

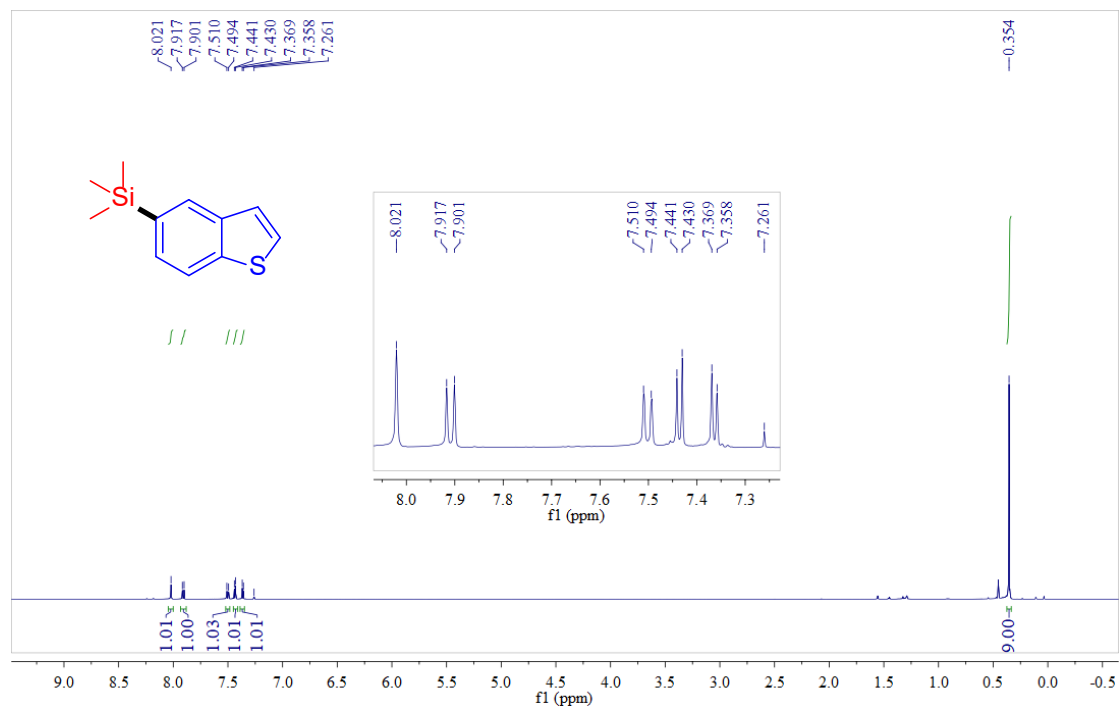

### <sup>13</sup>C NMR Spectrum of 3p

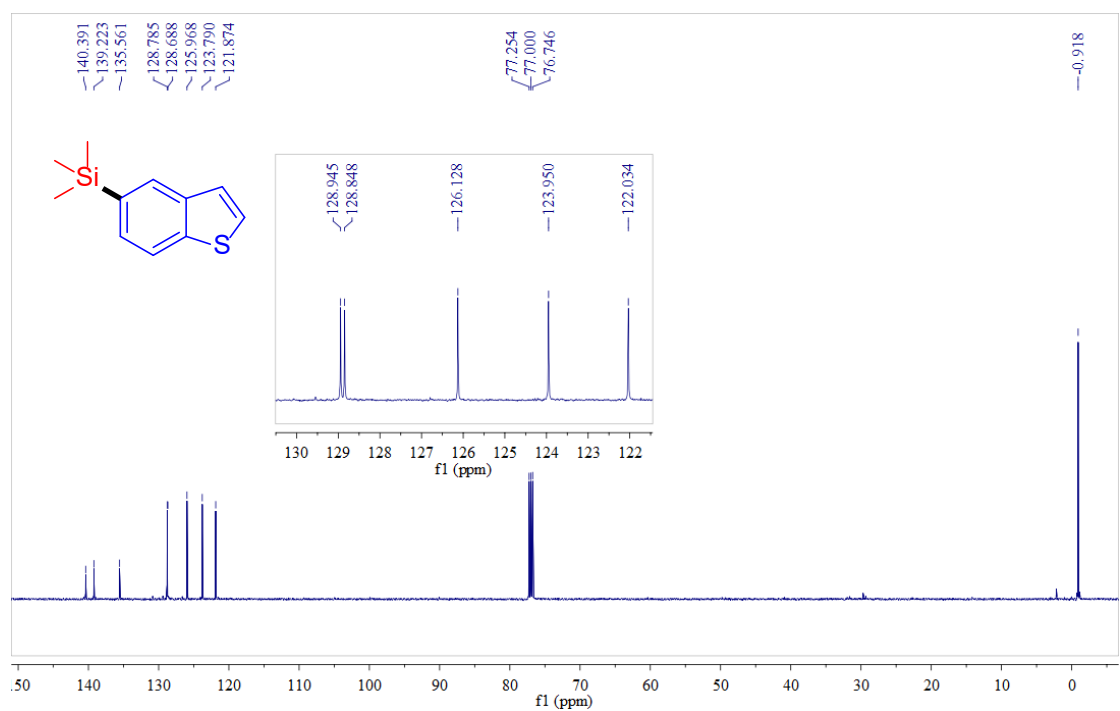

### <sup>1</sup>H NMR Spectrum of 3q

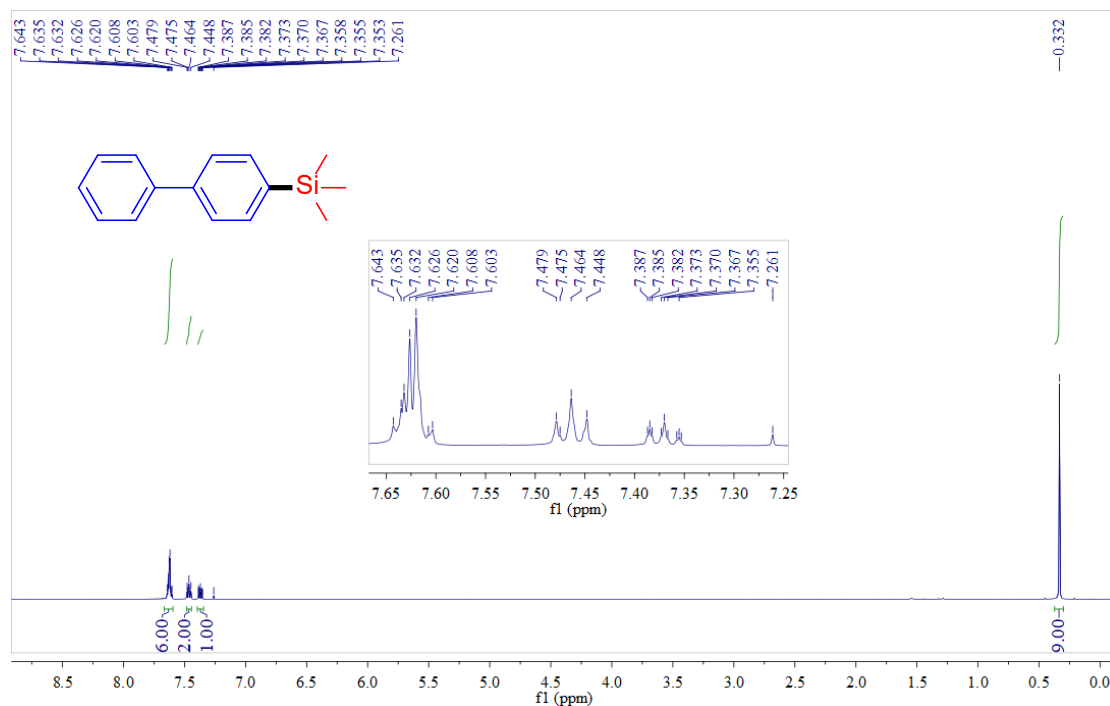

### <sup>13</sup>C NMR Spectrum of 3q

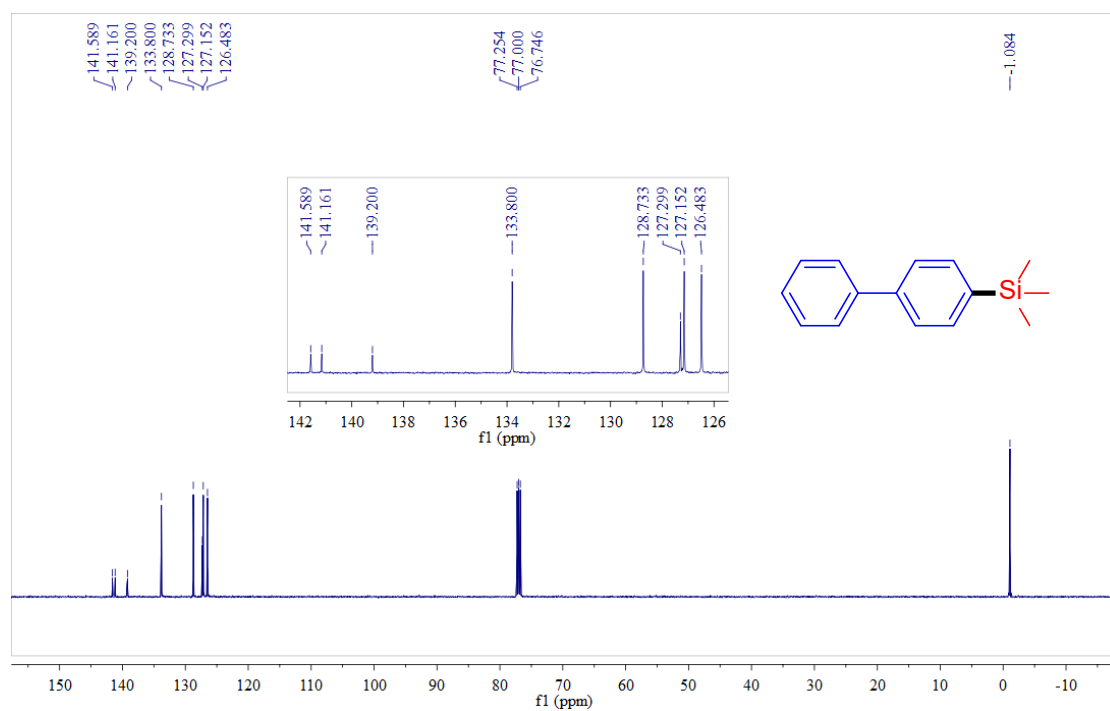

### <sup>1</sup>H NMR Spectrum of 3r

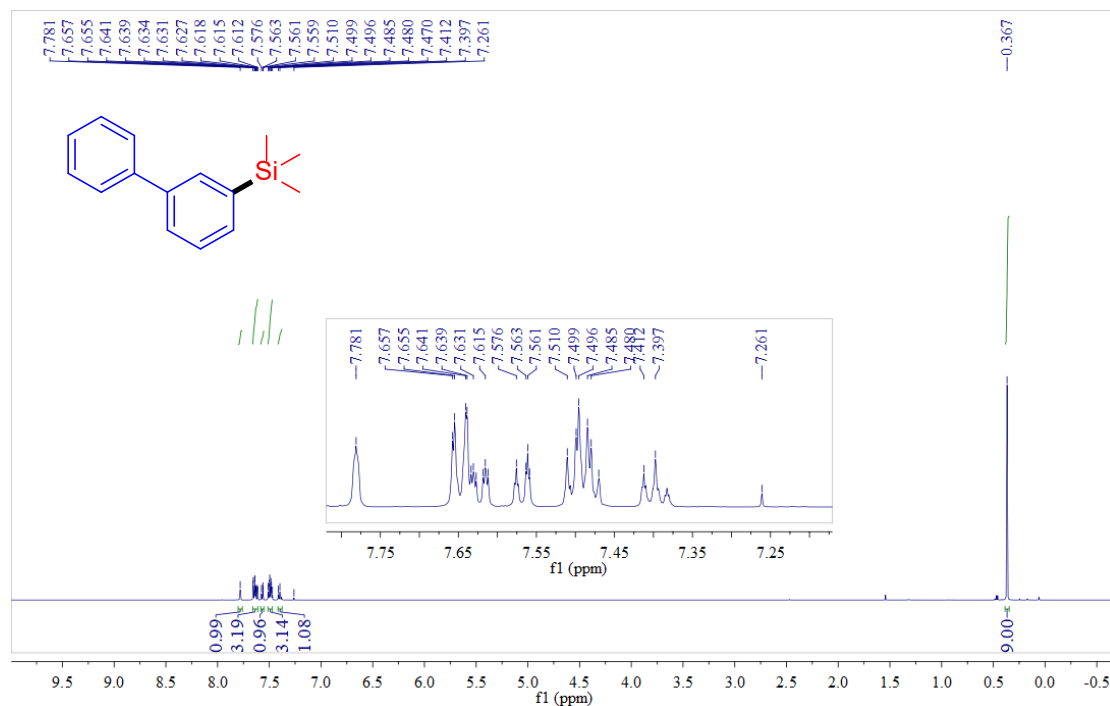

### <sup>13</sup>C NMR Spectrum of 3r

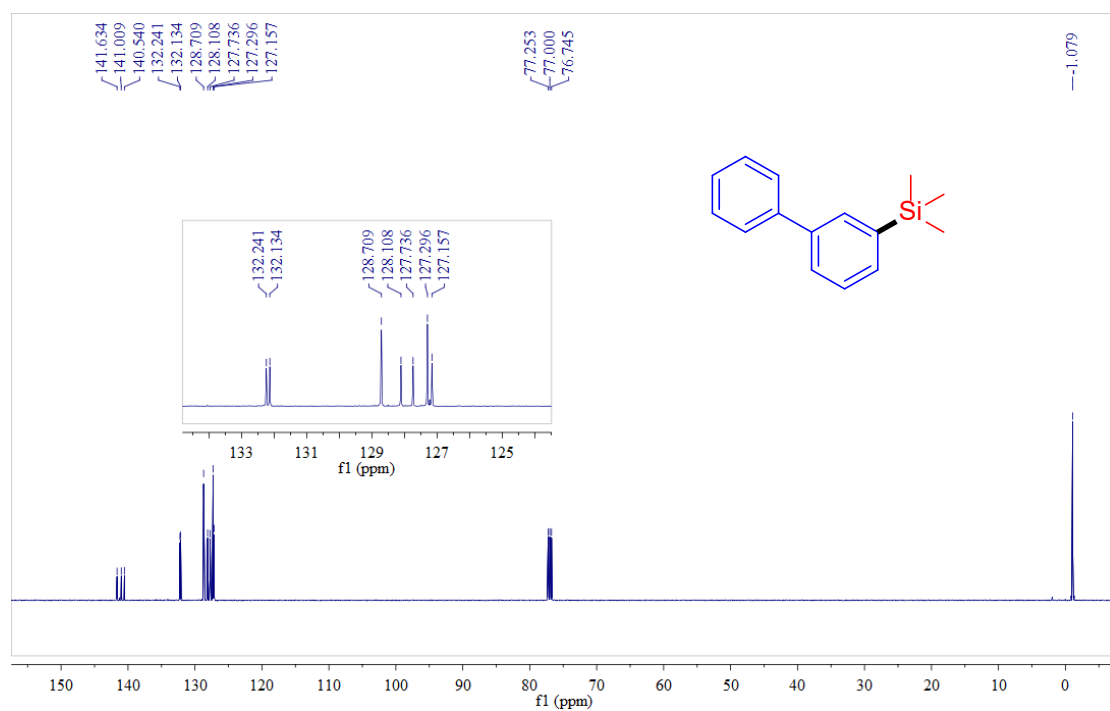

### $^1\text{H}$ NMR Spectrum of **3s**

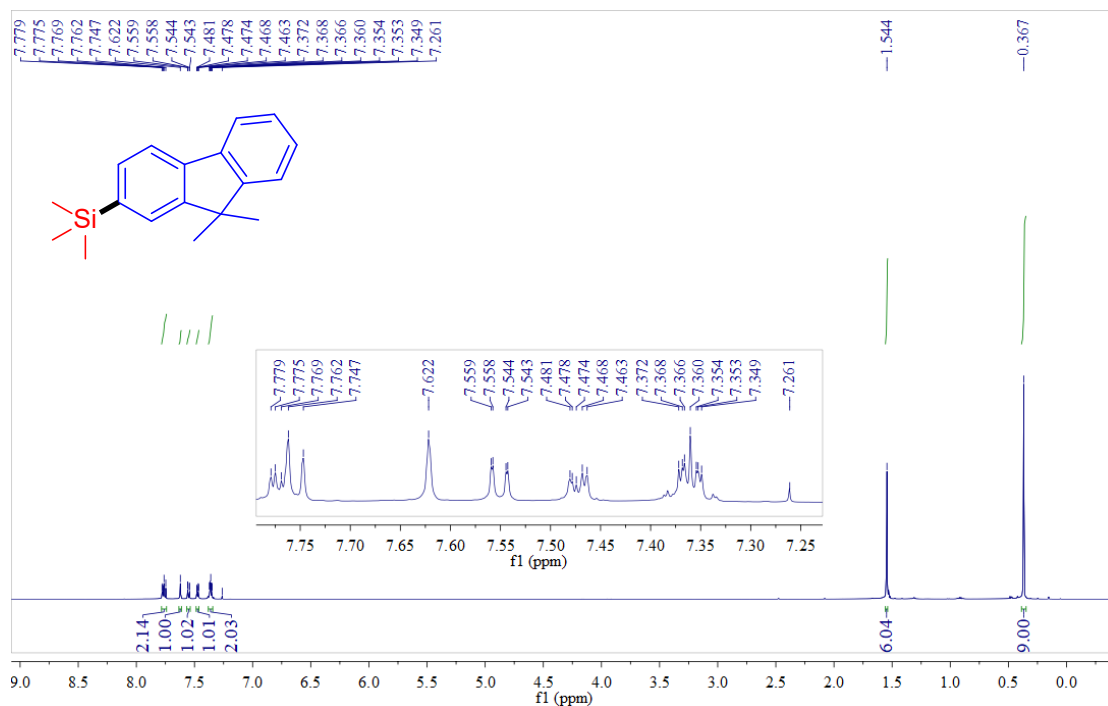

### $^{13}\text{C}$ NMR Spectrum of **3s**

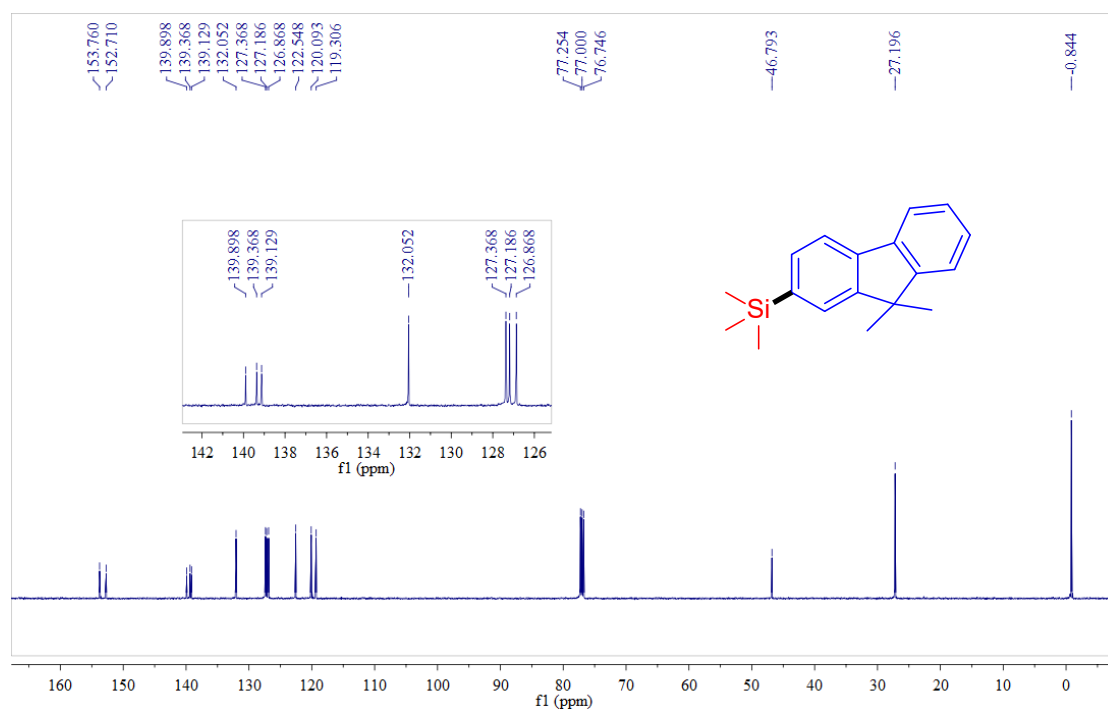



### <sup>1</sup>H NMR Spectrum of 3t

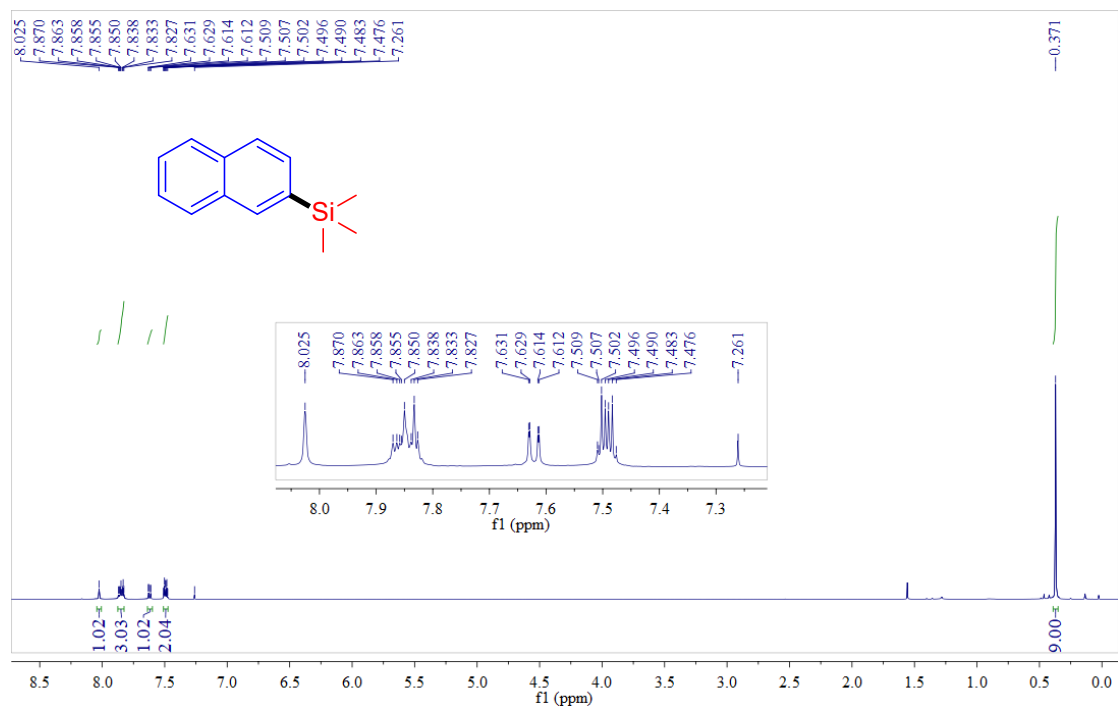

### <sup>13</sup>C NMR Spectrum of 3t

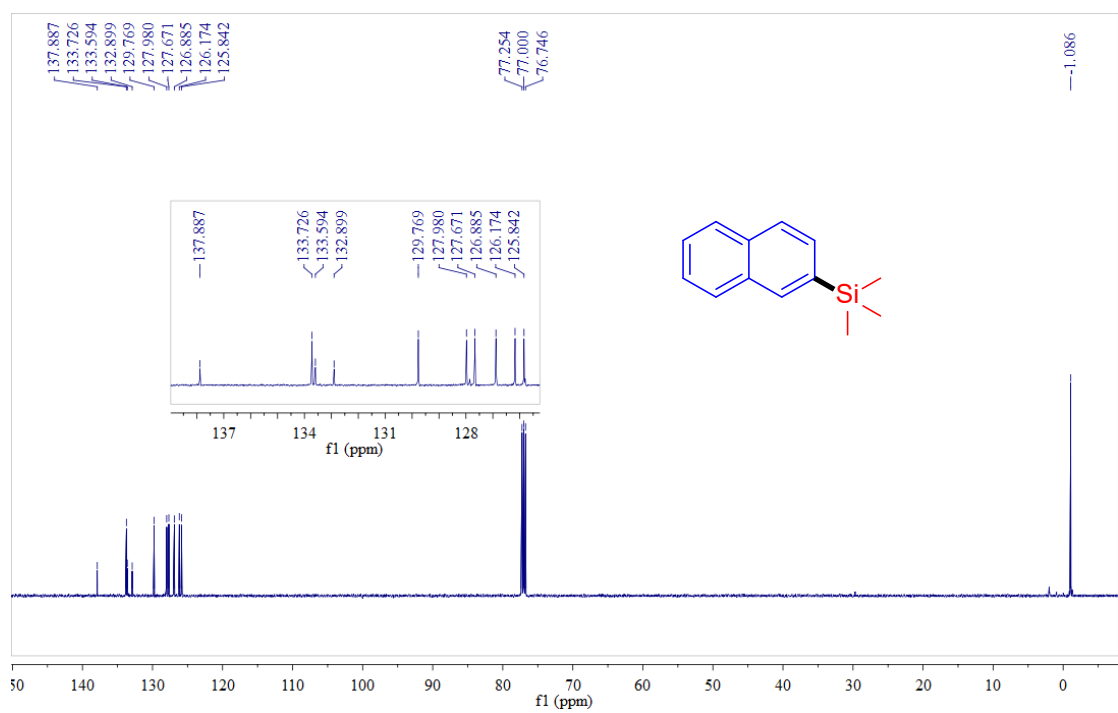

### <sup>1</sup>H NMR Spectrum of 4

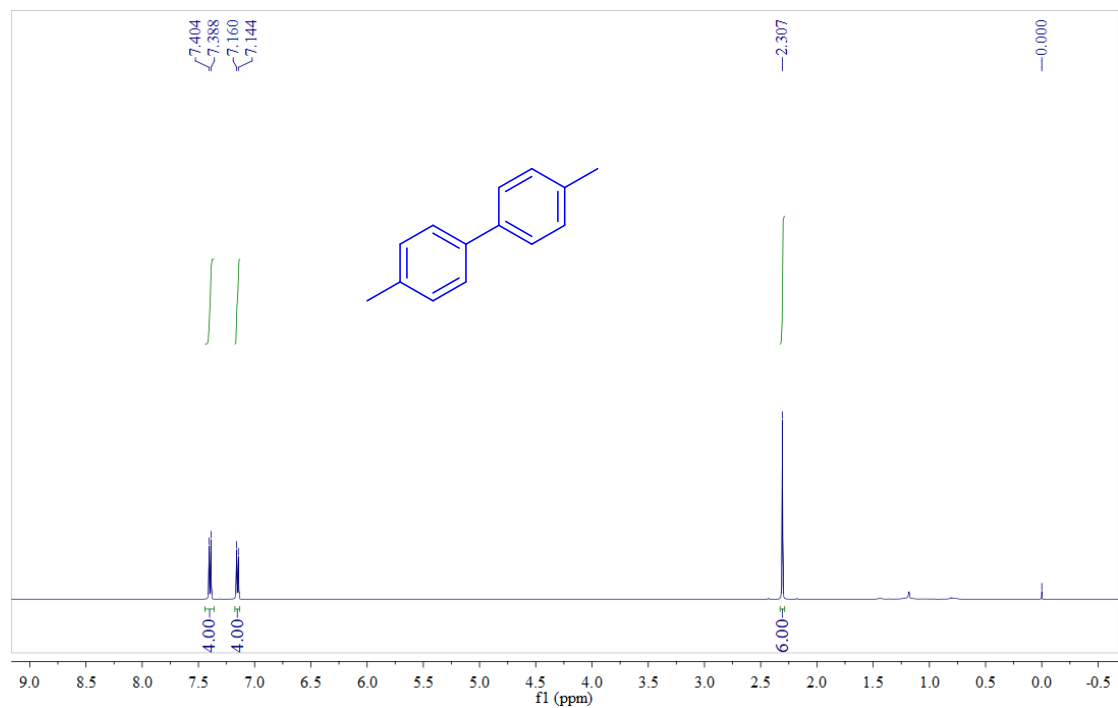

### <sup>13</sup>C NMR Spectrum of 4

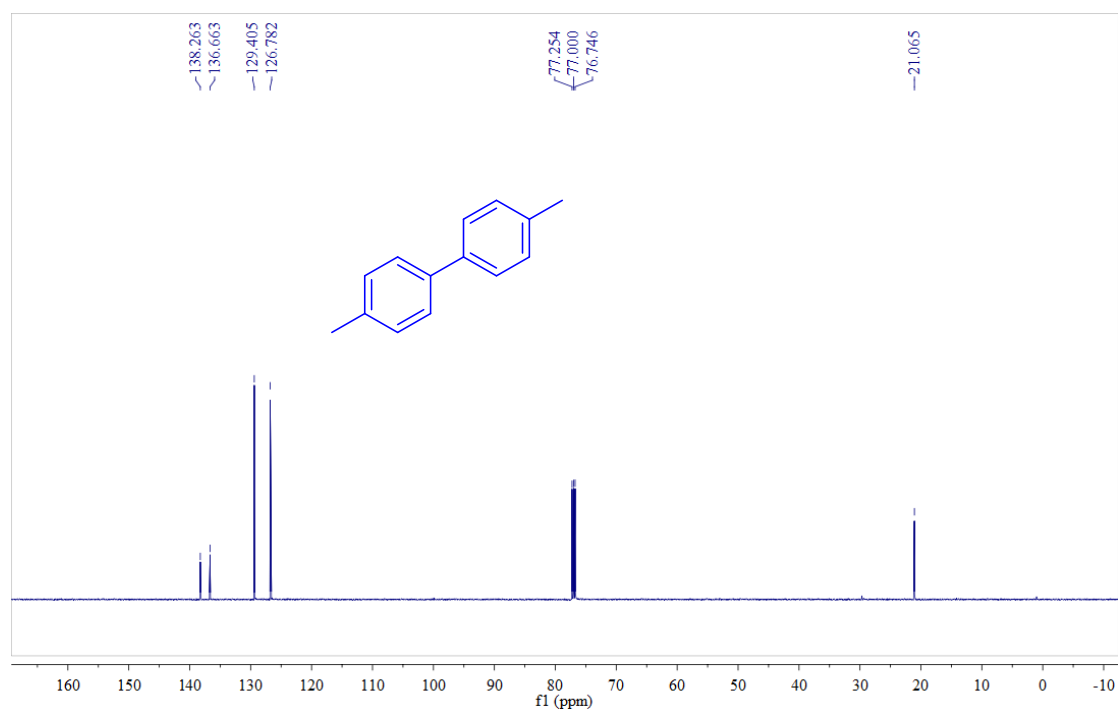

### <sup>1</sup>H NMR Spectrum of **5**

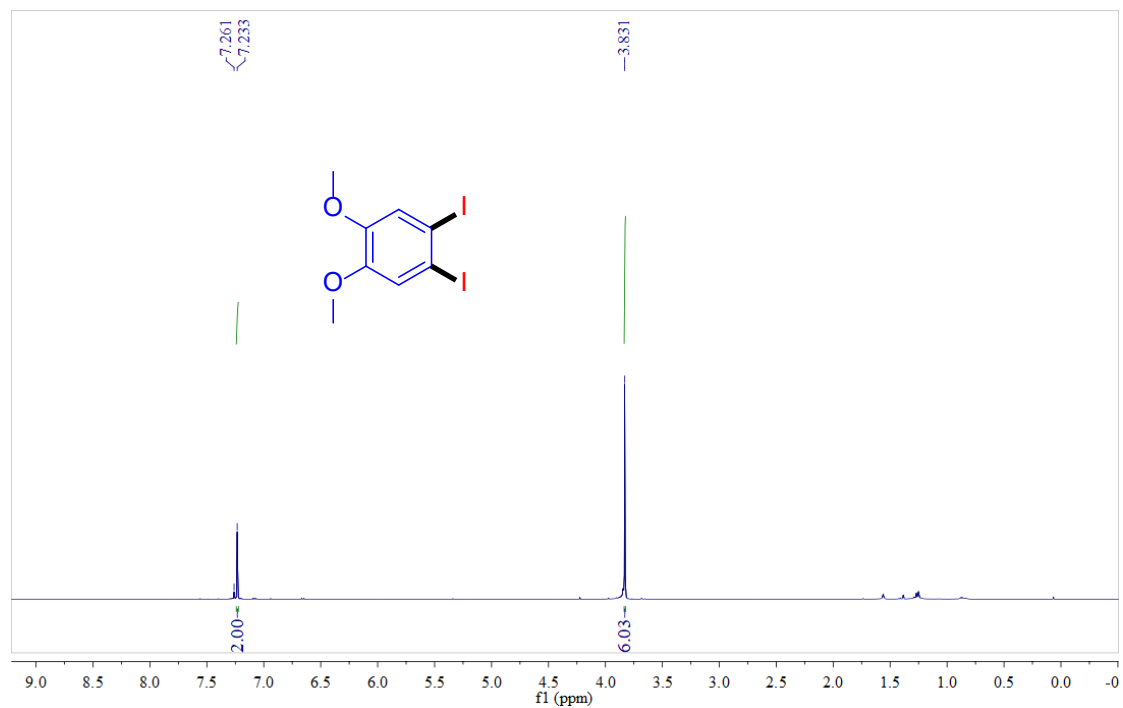

### <sup>13</sup>C NMR Spectrum of **5**

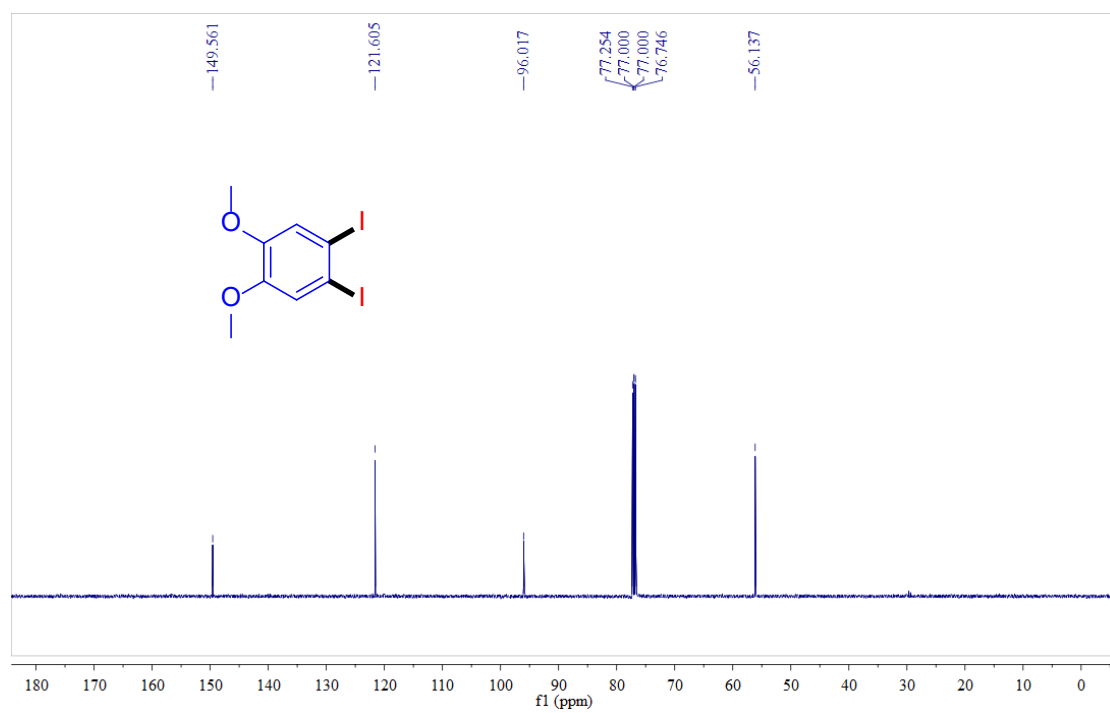

### <sup>1</sup>H NMR Spectrum of **6**

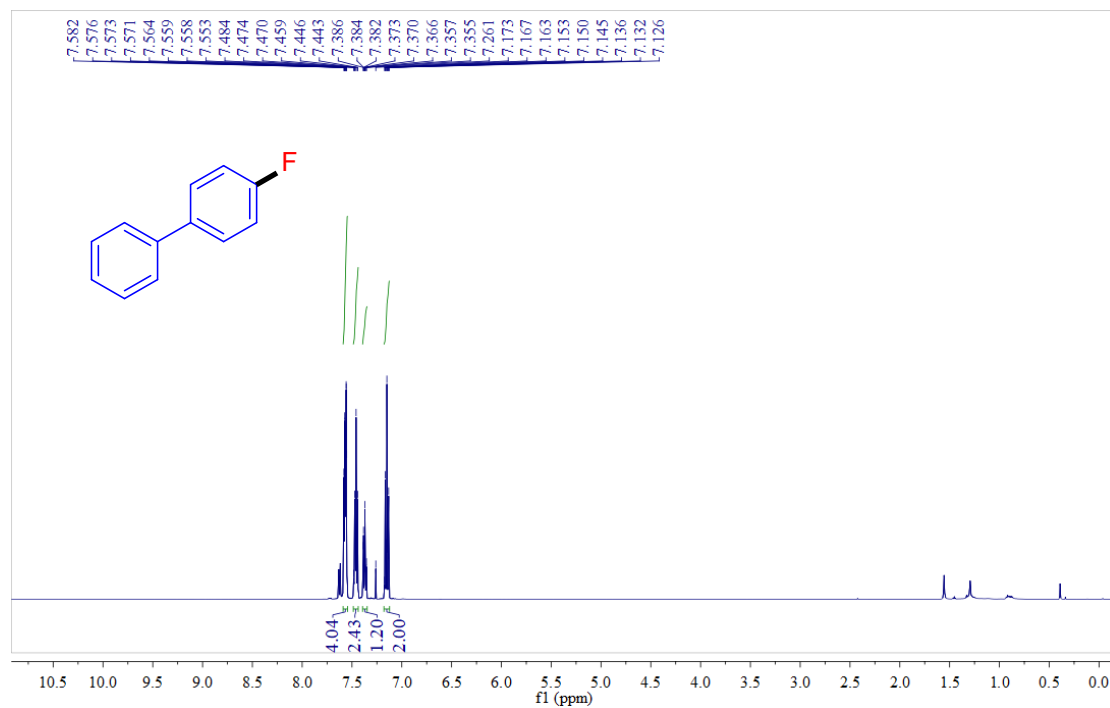

### <sup>13</sup>C NMR Spectrum of **6**

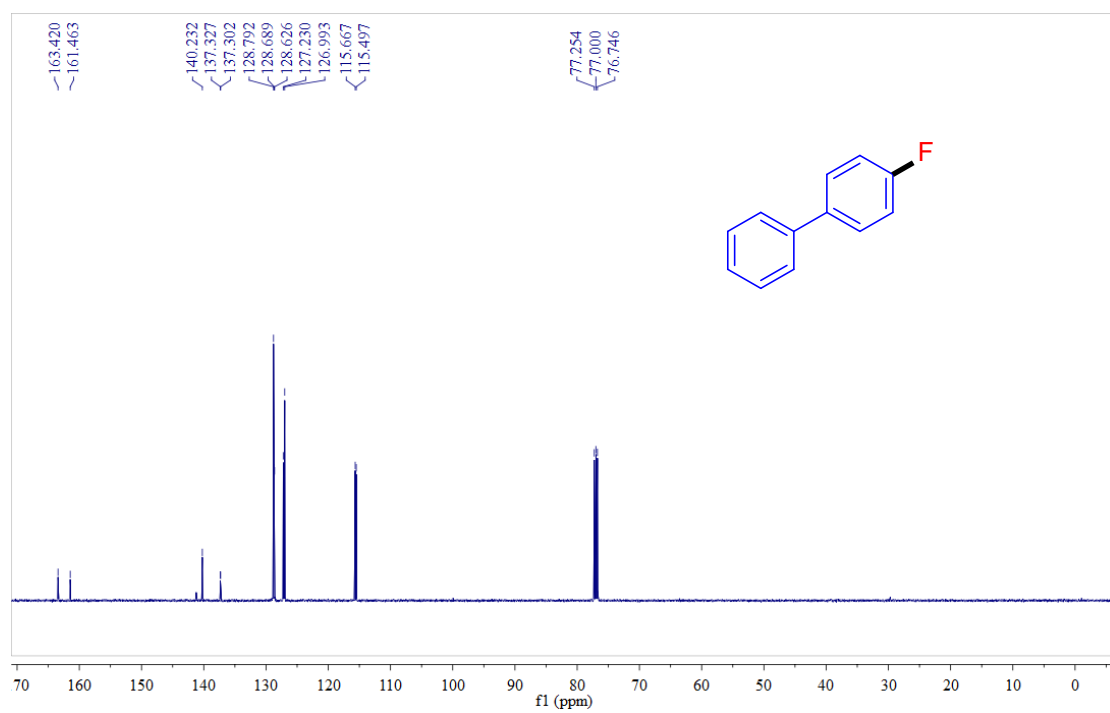

### $^{19}\text{F}$ NMR Spectrum of **6**

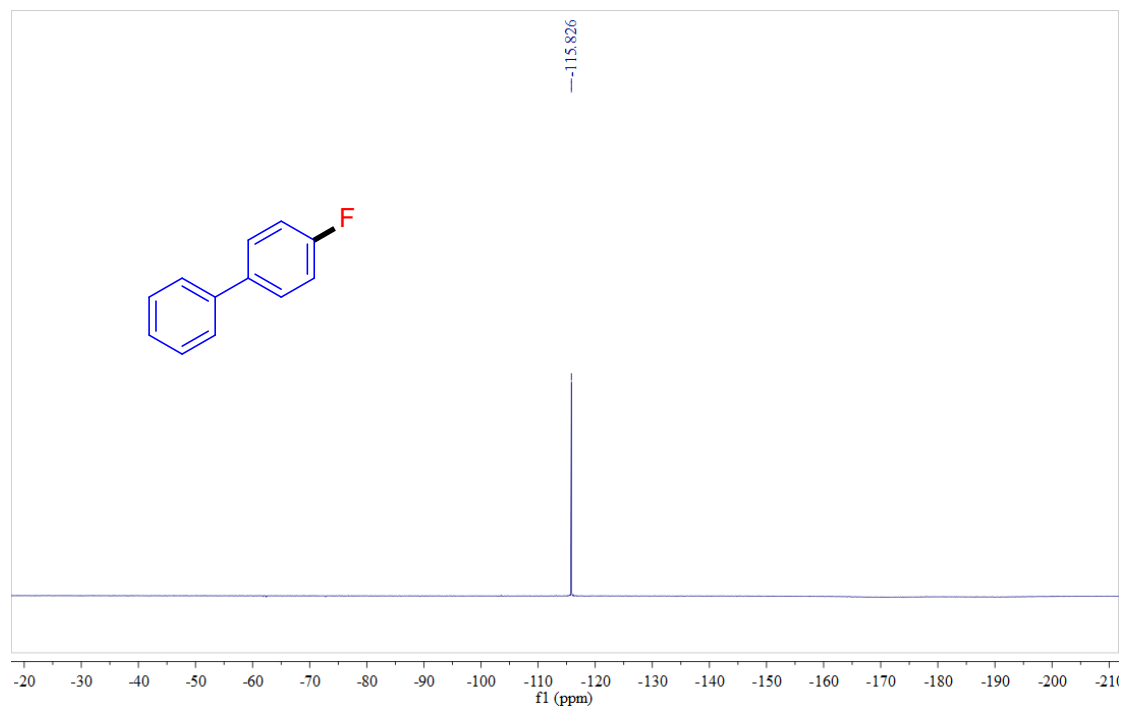

### $^1\text{H}$ NMR Spectrum of **7**

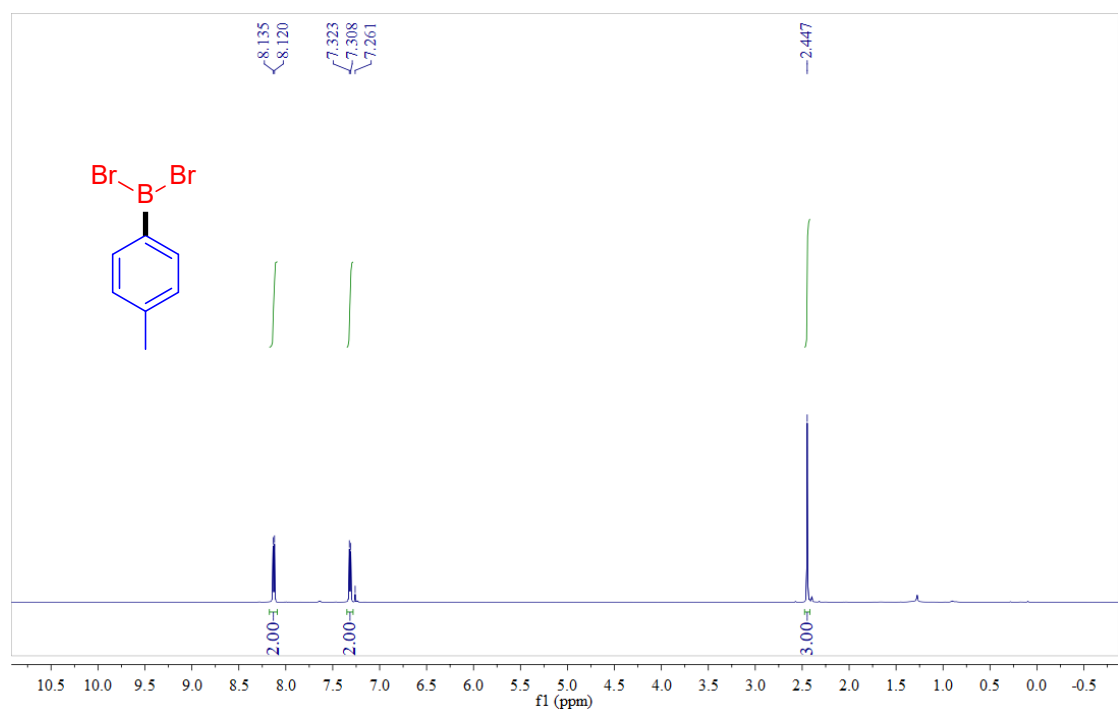

### <sup>13</sup>C NMR Spectrum of 7

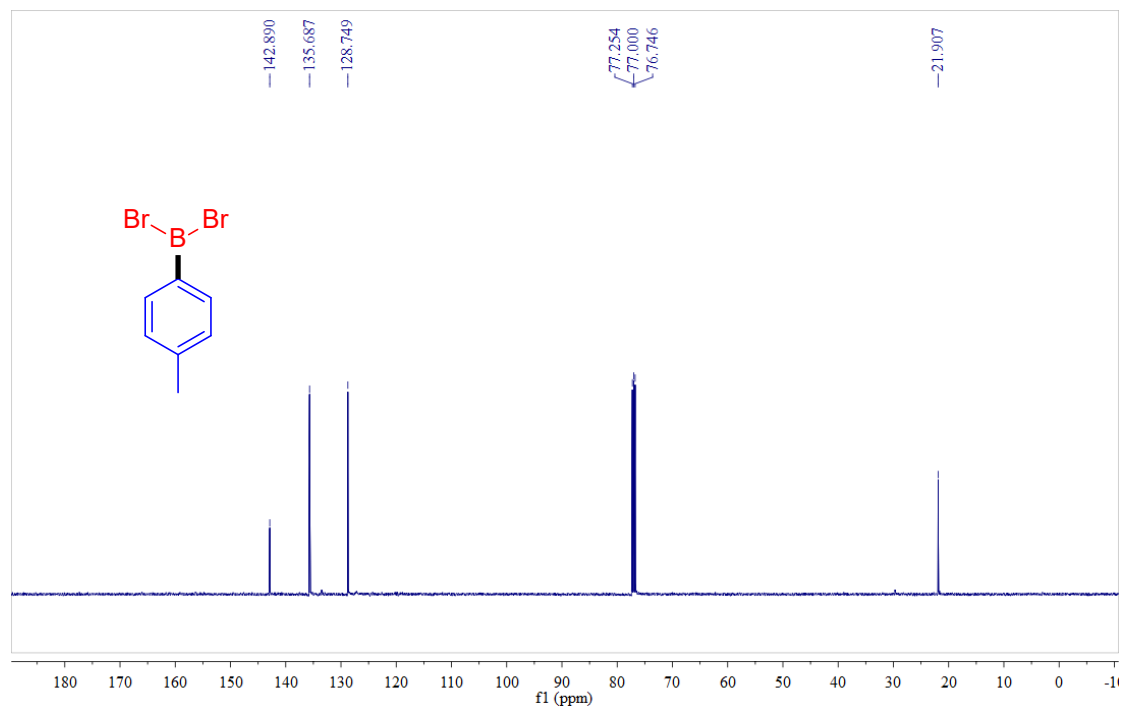

### <sup>1</sup>H NMR Spectrum of 8

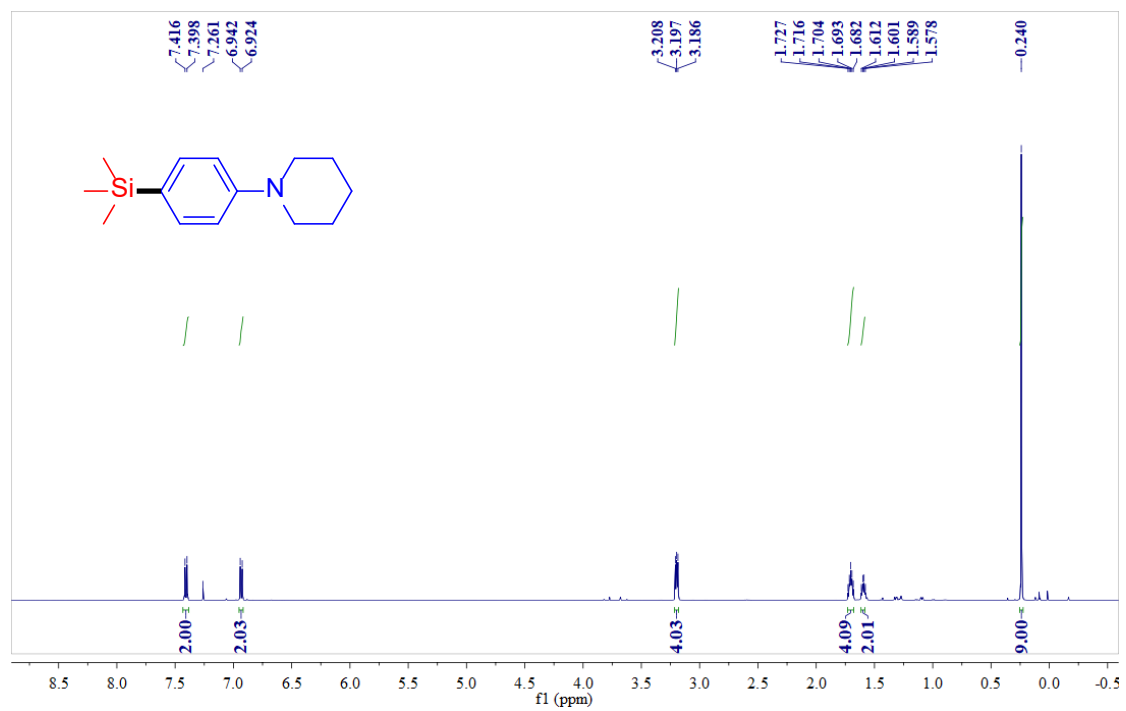

### $^{13}\text{C}$ NMR Spectrum of **8**

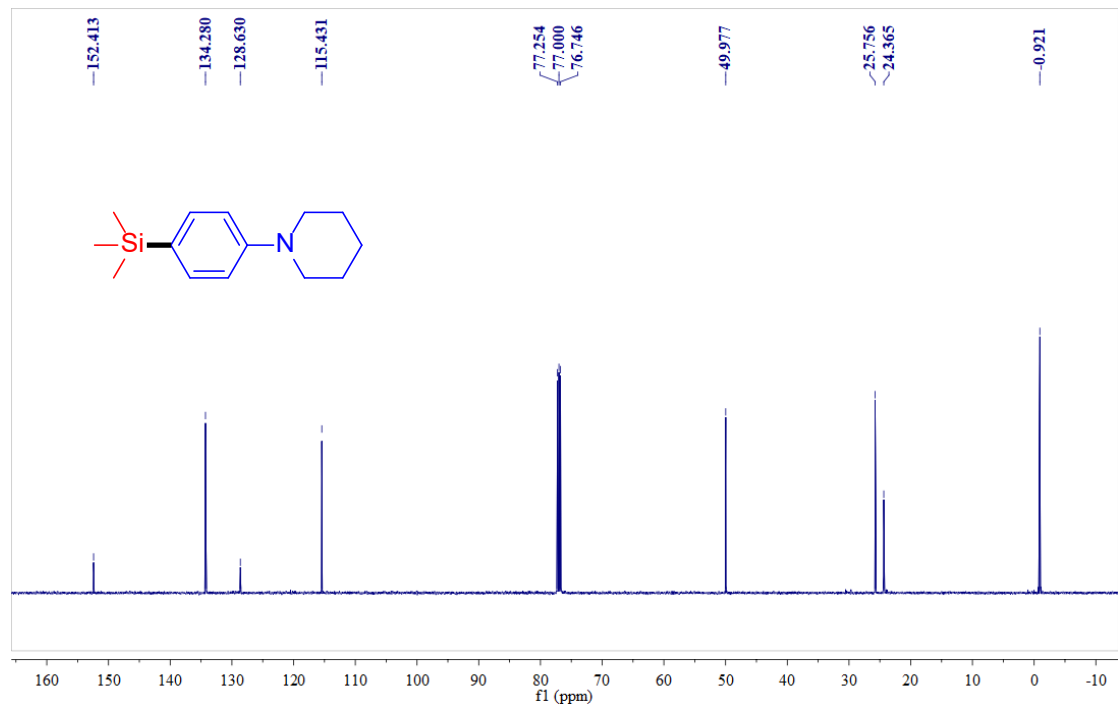

### $^1\text{H}$ NMR Spectrum of **9**

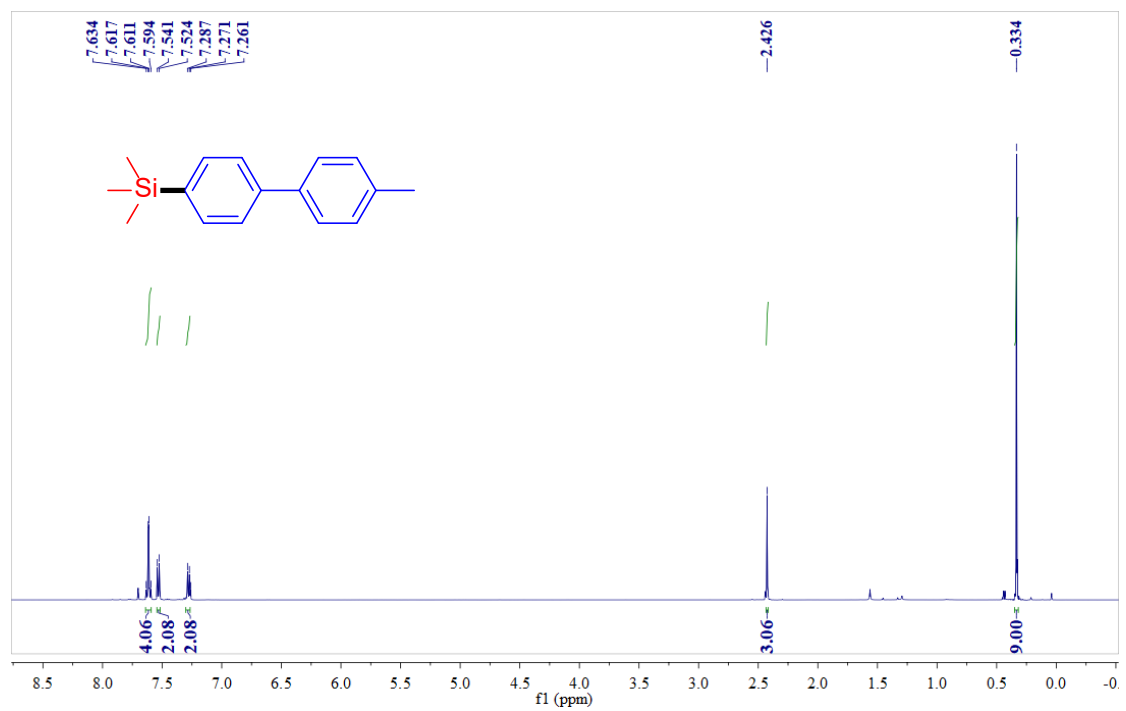

# <sup>13</sup>C NMR Spectrum of 9

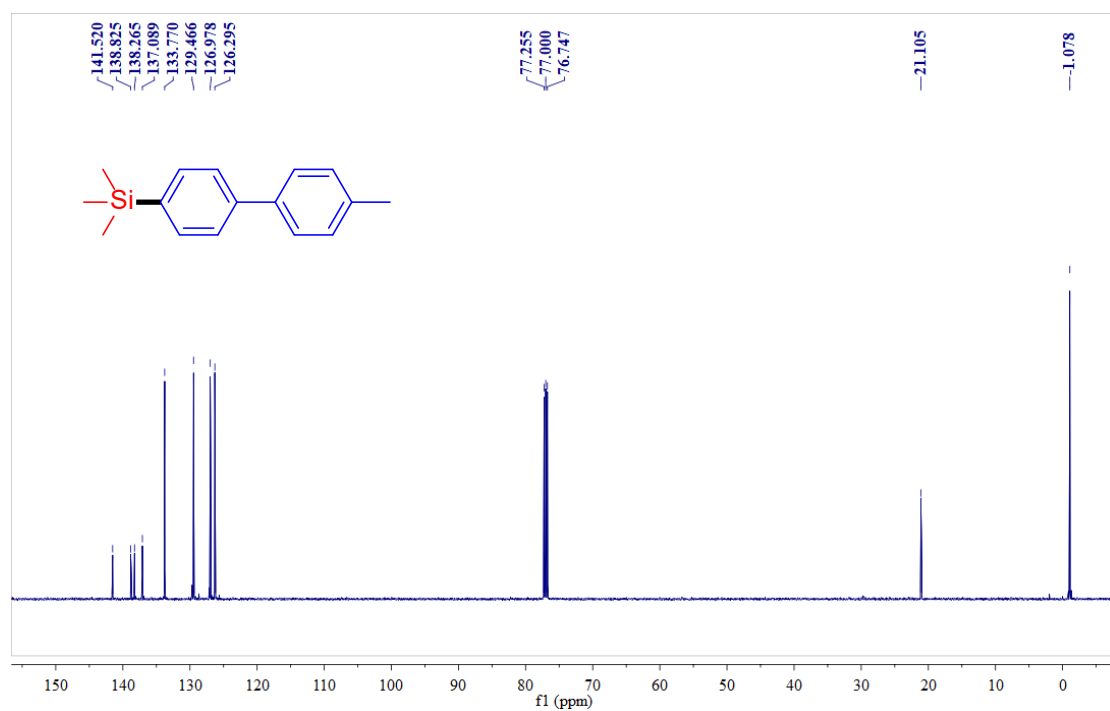

Supplement: d2qo01764d1.pdf [file d2qo01764d1.pdf]
